# Supplementary material for: The tandem Agenet domain of fragile X mental retardation protein interacts with FUS
Source: PubMed Central journal article supplement (PMC5430443; doi:10.1038/s41598-017-01175-8), 2017-04-19
Supplement: 41598_2017_1175_MOESM1_ESM.pdf [file 41598_2017_1175_MOESM1_ESM.pdf]

**Title**

The tandem Agenet domain of fragile X mental retardation protein interacts with FUS

**Author names and affiliations**

Qingzhong He<sup>1</sup>, Wei Ge<sup>2\*</sup>

1 National Key Laboratory of Medical Molecular Biology & Department of Biochemistry and Molecular Biology, Institute of Basic Medical Sciences, Chinese Academy of Medical Sciences, Beijing, China

2 National Key Laboratory of Medical Molecular Biology & Department of Immunology, Institute of Basic Medical Sciences, Chinese Academy of Medical Sciences, Beijing, China

## Supplementary Figures

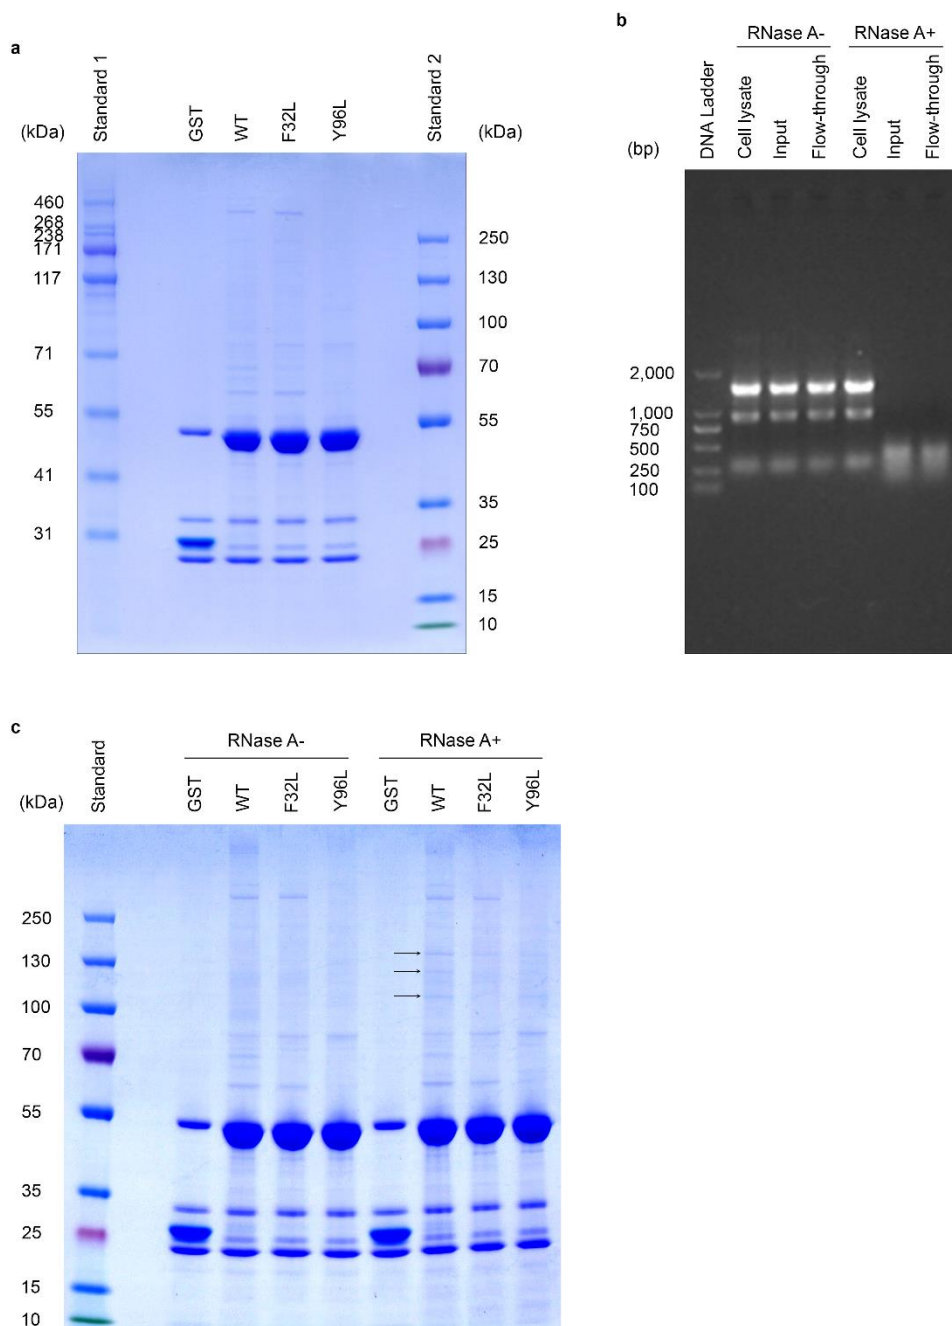

**Supplementary Figure 1** FMRP-1-200 interacts with several proteins in an RNA-independent manner. a, Original image of Figure 1a. b, RNase A treatment degraded almost all RNAs in the GST pull-down input. “Cell lysate”, fresh cell lysate without any treatment. “Input”, cell lysate treated by RNase A or the enzyme buffer, used

in the GST pull-down. “Flow-through”, GST pull-down flow-through of the “input”. c,  
Interaction with FMRP-1-200 was not attenuated by treatment with RNase A. Instead,  
several new bands (indicated by arrows) emerged with the wild-type bait after the  
treatment.

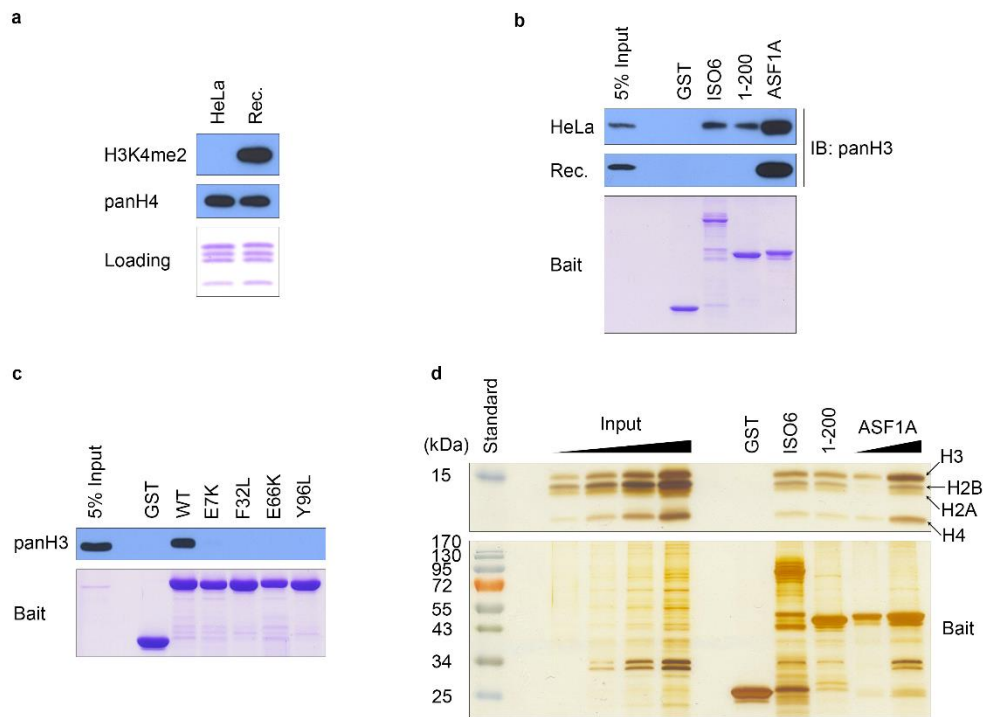

**Supplementary Figure 2** FMRP-1-200 interacts with histones in vitro. a, Histones used in GST pull-down assays. HeLa, acid-extracted bulk histones from HeLa cells, with post-translational modifications (PTMs). Rec., recombinant histone octamer with no PTMs. b, FMRP-1-200 interacts with HeLa histones but not recombinant histones, which suggests the interaction is PTM-dependent. c, Single mutations on putative salt bridges (E7K and E66K) and methyl-binding pockets (F32L and Y96L) abolish the interaction with histones. d, Silver staining revealed that FMRP-1-200 showed no apparent preference for the H3-H4 tetramer or H2B-H2A dimer, compared with chaperone ASF1A. ISO6: Full-length GST-tagged human FMRP isoform 6 (GenBank: NP\_001172004.1).

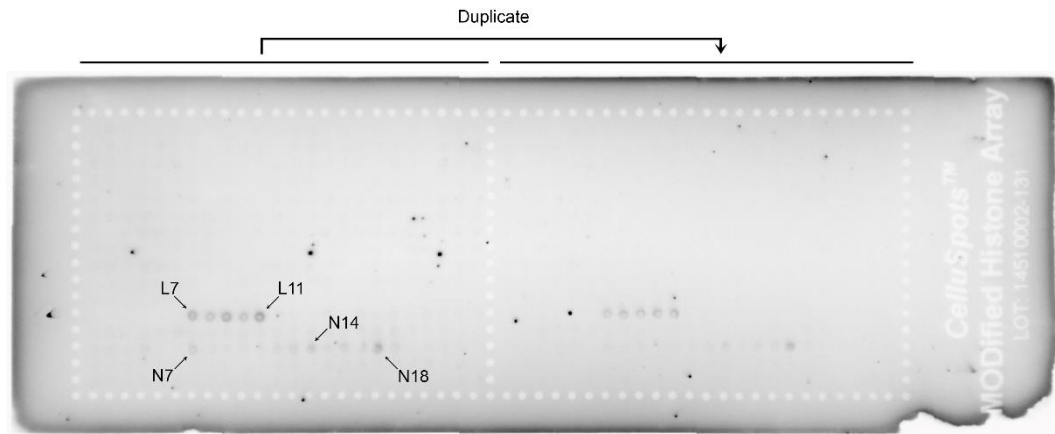

**Supplementary Figure 3** GST-FMRP-1-200 showed a weak interaction with Dot L7-L11, N7, N14 and N18 on the MODified™ Histone Peptide Array of Active Motif®. Please refer to Supplementary Table 2 for the corresponding peptide sequences of the dots. The peptide array was a kind gift from Prof. Guohong Li. We followed the manufacturer's protocol to perform the assay. Briefly, 15-ml 1- $\mu$ M purified GST-FMRP-1-200 was incubated with the array blocked by skim milk. After the incubation, the array was washed and detected with anti-GST and a HRP-conjugated secondary antibody by chemiluminescent substrate.

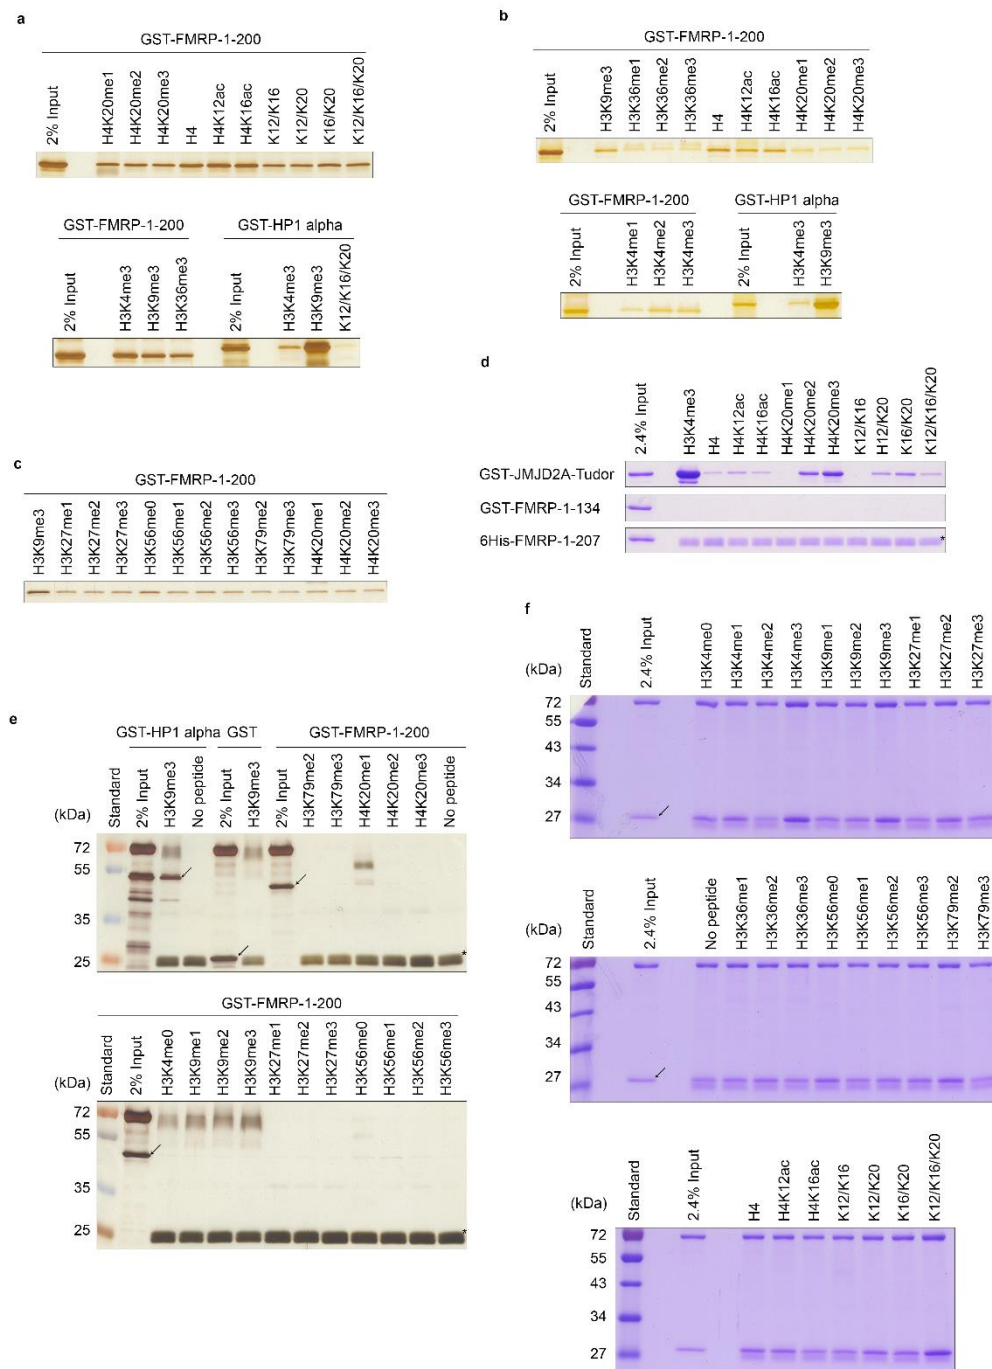

**Supplementary Figure 4** The TAD of FMRP showed no strong interaction with lysine-methylated histone peptides in peptide pull-down assays. a, GST-FMRP-1-200 showed weak/negligible interaction with modified histone peptides in pull-down assays. GST-HP1 alpha represents the positive control. Pull-down system: 2  $\mu$ g peptide vs. 10

µg protein in 10 mM Tris-HCl, pH 7.4, 150 mM NaCl, 0.05% Tween<sup>®</sup> 20, 0.04 mg/ml BSA.

b, GST-FMRP-1-200 showed weak/negligible interactions with modified histone peptides in pull-down assays. GST-HP1 alpha represents the positive control. Pull-down system: 2 µg peptide vs. 10 µg protein in 10 mM Tris-HCl, pH 7.4, 150 mM NaCl, 0.05% Tween<sup>®</sup> 20, 0.04 mg/ml BSA. c, GST-FMRP-1-200 showed no preference among H3K27me1/2/3, H3K56me0/1/2/3, H3K79me2/3 and H4K20me1/2/3. Pull-down system: 2 µg peptide vs. 10 µg protein in 50 mM Tris-HCl, pH 7.4, 100 mM NaCl, 0.5% Triton<sup>™</sup> X-100, 0.03 mg/ml BSA. d, GST-FMRP-1-134 and 6His-FMRP-1-207 showed no binding with modified H4 peptides. GST-JMJD2A-Tudor vs. H3K4me3 was used as the positive control. Pull-down system: 20 mM Tris-HCl, pH 8.0, 200 mM NaCl, 0.01% IGEPAL<sup>®</sup> CA-630, 10% glycerol.

e, GST-FMRP-1-200 showed weak/negligible interactions with modified histone peptides in pull-down assays. GST-HP1 alpha was used as the positive control. GST was used as the negative control. Pull-down system: 50 mM Tris-HCl, pH 7.4, 300 mM NaCl, 0.05% IGEPAL<sup>®</sup> CA-630, 0.03 mg/ml BSA. f, 6His-FMRP-1-207 showed weak/negligible interactions with modified histone peptides in pull-down assays. Pull-down system: 20 mM Tris-HCl, pH 7.4, 150 mM NaCl, 0.04 mg/ml BSA. Arrows indicate the prey proteins. Asterisks indicate bands derived from streptavidin beads. K12/K16, H4G11-T30 (K12ac, K16ac). K12/K20, H4G11-T30 (K12ac, K20me3). K16/K20, H4G11-T30 (K16ac, K20me3). K12/K16/K20, H4G11-T30 (K12ac, K16ac, K20me3).

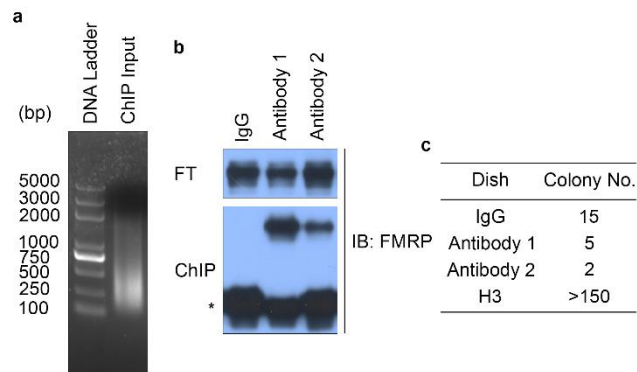

**Supplementary Figure 5** ChIP-cloning assay showed that few DNAs co-precipitated with endogenous FMRP in Neuro-2a cells. a, Chromatin fragments of approx. 250 bp were used as the ChIP input. b, Antibody 1 (anti-FMRP) and Antibody 2 (anti-FMR1) precipitated endogenous FMRP in ChIP assays. Asterisk indicates IgG heavy chains. c, Bacterial colony numbers derived from different antibodies reflect the co-precipitation of relatively few DNAs with endogenous FMRP.



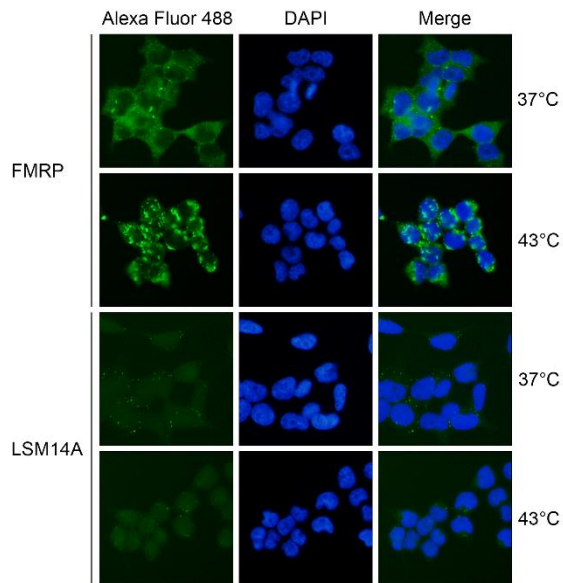

**Supplementary Figure 6** Under heat stress, endogenous FMRP forms stress granules in the cytoplasm, while endogenous LSM14A resides in P-bodies. Endogenous FMRP or LSM14A was marked by indirect immunofluorescence with Alexa Fluor 488-conjugated secondary antibodies. Heat stress was applied by incubating cells at 43°C for 30 min. Images were captured under a conventional microscope.

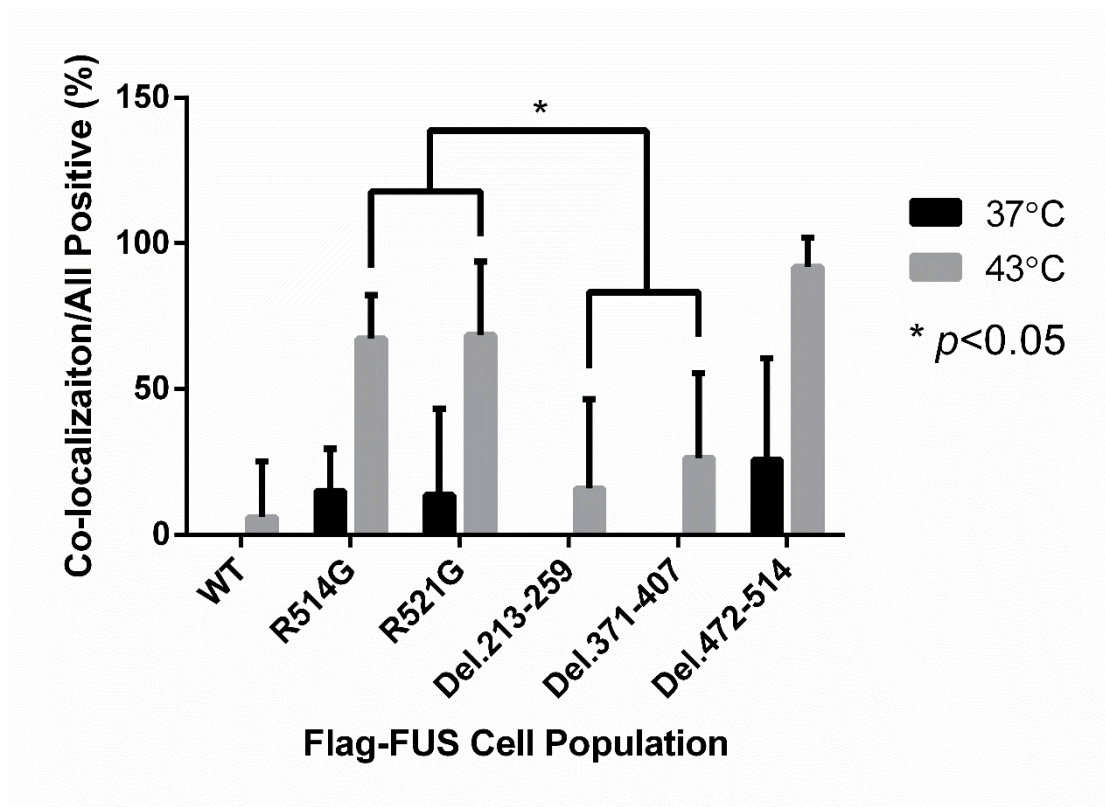

**Supplementary Figure 7** When 213-259 or 371-407 was deleted, the co-localization of Flag-FUS and endogenous FMRP was attenuated under heat stress. At least 10 microscopy fields were randomly collected from each cell population transfected with Flag-FUS or its mutants. The ratio of FMRP-Flag co-localization cell number to all Flag-positive cell number was calculated. Values are shown as the means  $\pm$  SD. Student's *t*-tests were performed. *P*-values less than 0.05 were considered statistically significant.

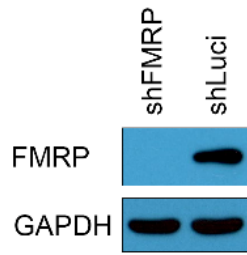

**Supplementary Figure 8** Efficiency of lentivirus vector-mediated FMRP knockdown in

HEK293T cells.

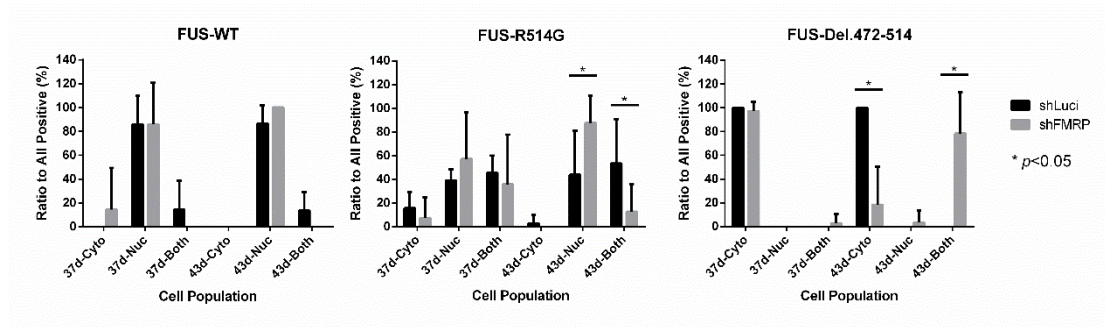

**Supplementary Figure 9** FMRP knockdown enhanced the nuclear accumulation of FUS mutants under heat stress. At least six microscopy fields were collected from each cell population transfected with Flag-FUS or its mutants and treated at 37°C (“37d”) or 43°C (“43d”). The ratio of specifically localized cell numbers to all Flag-positive cell numbers was calculated (Cyto, cytoplasmic. Nuc, nuclear. Both, both in cytoplasm and nucleus). Values are the means  $\pm$  SD. Student’s *t*-tests were performed. *P*-values <0.05 were considered statistically significant.

**Supplementary Table 1** The list of proteins identified with mass spectrum in the rectangle area of SDS-PAGE in Figure 1a.

| Accession | Description                                                                                           | Score   | Coverage | Unique Peptides | MW [kDa] | calc. pI |
|-----------|-------------------------------------------------------------------------------------------------------|---------|----------|-----------------|----------|----------|
| Q5JRA6    | Melanoma inhibitory activity protein 3 OS=Homo sapiens GN=MIA3 PE=1 SV=1 - [MIA3_HUMAN]               | 4183.31 | 60.88    | 109             | 213.6    | 4.84     |
| P12270    | Nucleoprotein TPR OS=Homo sapiens GN=TPR PE=1 SV=3 - [TPR_HUMAN]                                      | 1873.95 | 53.70    | 126             | 267.1    | 5.02     |
| Q09666    | Neuroblast differentiation-associated protein AHNAK OS=Homo sapiens GN=AHNAK PE=1 SV=2 - [AHNK_HUMAN] | 867.48  | 51.32    | 153             | 628.7    | 6.15     |
| P48634    | Protein PRRC2A OS=Homo sapiens GN=PRRC2A PE=1 SV=3 - [PRC2A_HUMAN]                                    | 324.12  | 34.72    | 51              | 228.7    | 9.45     |
| P35527    | Keratin, type I cytoskeletal 9 OS=Homo sapiens GN=KRT9 PE=1 SV=3 - [K1C9_HUMAN]                       | 290.57  | 60.03    | 24              | 62.0     | 5.24     |
| P04264    | Keratin, type II cytoskeletal 1 OS=Homo sapiens GN=KRT1 PE=1 SV=6 - [K2C1_HUMAN]                      | 256.55  | 50.16    | 25              | 66.0     | 8.12     |
| P15924    | Desmoplakin OS=Homo sapiens GN=DSP PE=1 SV=3 - [DESP_HUMAN]                                           | 240.21  | 27.38    | 72              | 331.6    | 6.81     |
| P49327    | Fatty acid synthase OS=Homo sapiens GN=FASN PE=1 SV=3 - [FAS_HUMAN]                                   | 228.22  | 23.62    | 45              | 273.3    | 6.44     |
| Q06787    | Fragile X mental retardation protein 1 OS=Homo sapiens GN=FMR1 PE=1 SV=1 - [FMR1_HUMAN]               | 213.56  | 13.77    | 8               | 71.1     | 7.42     |
| Q8IWX3    | Ankyrin repeat and KH domain-containing protein 1 OS=Homo sapiens GN=ANKHD1 PE=1 SV=1 - [ANKH1_HUMAN] | 139.21  | 16.13    | 23              | 269.3    | 5.73     |
| P68104    | Elongation factor 1-alpha 1 OS=Homo sapiens GN=EEF1A1 PE=1 SV=1 - [EF1A1_HUMAN]                       | 119.54  | 30.09    | 13              | 50.1     | 9.01     |
| P07477    | Trypsin-1 OS=Homo sapiens GN=PRSS1 PE=1 SV=1 - [TRY1_HUMAN]                                           | 102.23  | 7.29     | 2               | 26.5     | 6.51     |
| P35908    | Keratin, type II cytoskeletal 2 epidermal OS=Homo sapiens GN=KRT2 PE=1 SV=2 - [K22E_HUMAN]            | 100.18  | 43.97    | 18              | 65.4     | 8.00     |
| Q9Y520    | Protein PRRC2C OS=Homo sapiens GN=PRRC2C PE=1 SV=4 - [PRC2C_HUMAN]                                    | 95.60   | 10.32    | 20              | 316.7    | 9.13     |
| P13645    | Keratin, type I cytoskeletal 10 OS=Homo sapiens GN=KRT10 PE=1 SV=6 - [K1C10_HUMAN]                    | 94.32   | 34.59    | 17              | 58.8     | 5.21     |
| O15027    | Protein transport protein Sec16A OS=Homo sapiens GN=SEC16A PE=1 SV=3 - [SC16A_HUMAN]                  | 90.21   | 12.67    | 19              | 233.4    | 5.63     |
| Q8IVF2    | Protein AHNAK2 OS=Homo sapiens GN=AHNAK2 PE=1 SV=2 - [AHNK2_HUMAN]                                    | 77.88   | 14.60    | 22              | 616.2    | 5.36     |
| O75179    | Ankyrin repeat domain-containing protein 17 OS=Homo sapiens GN=ANKRD17 PE=1 SV=3 - [ANR17_HUMAN]      | 69.54   | 9.53     | 8               | 274.1    | 6.52     |
| Q14643    | Inositol 1,4,5-trisphosphate receptor type 1 OS=Homo sapiens GN=ITPR1 PE=1 SV=3 - [ITPR1_HUMAN]       | 67.80   | 8.96     | 14              | 313.7    | 6.04     |
| Q14573    | Inositol 1,4,5-trisphosphate receptor type 3 OS=Homo sapiens GN=ITPR3 PE=1 SV=2 - [ITPR3_HUMAN]       | 57.10   | 8.54     | 15              | 303.9    | 6.48     |
| Q14571    | Inositol 1,4,5-trisphosphate receptor type 2 OS=Homo sapiens GN=ITPR2 PE=1 SV=2 - [ITPR2_HUMAN]       | 55.94   | 8.22     | 14              | 307.9    | 6.43     |
| P21333    | Filamin-A OS=Homo sapiens GN=FLNA PE=1 SV=4 - [FLNA_HUMAN]                                            | 50.20   | 9.48     | 18              | 280.6    | 6.06     |
| Q5T5U3    | Rho GTPase-activating protein 21 OS=Homo sapiens GN=ARHGAP21 PE=1 SV=1 - [RHG21_HUMAN]                | 49.59   | 11.39    | 16              | 217.2    | 7.80     |
| Q6P2Q9    | Pre-mRNA-processing-splicing factor 8 OS=Homo sapiens GN=PRPF8 PE=1 SV=2 - [PRP8_HUMAN]               | 49.40   | 12.03    | 22              | 273.4    | 8.84     |
| Q9BTC0    | Death-inducer obliterator 1 OS=Homo sapiens GN=DIDO1 PE=1 SV=5 - [DIDO1_HUMAN]                        | 49.03   | 11.65    | 17              | 243.7    | 7.88     |
| P27708    | CAD protein OS=Homo sapiens GN=CAD PE=1 SV=3 - [PYR1_HUMAN]                                           | 45.22   | 12.31    | 22              | 242.8    | 6.46     |

|        |                                                                                                         |       |       |    |       |      |
|--------|---------------------------------------------------------------------------------------------------------|-------|-------|----|-------|------|
| Q9H4A3 | Serine/threonine-protein kinase WNK1 OS=Homo sapiens GN=WNK1 PE=1 SV=2 - [WNK1_HUMAN]                   | 45.05 | 8.86  | 15 | 250.6 | 6.34 |
| P27816 | Microtubule-associated protein 4 OS=Homo sapiens GN=MAP4 PE=1 SV=3 - [MAP4_HUMAN]                       | 44.38 | 15.63 | 13 | 120.9 | 5.43 |
| Q92616 | Translational activator GCN1 OS=Homo sapiens GN=GCN1L1 PE=1 SV=6 - [GCN1L_HUMAN]                        | 42.14 | 8.09  | 19 | 292.6 | 7.47 |
| P78527 | DNA-dependent protein kinase catalytic subunit OS=Homo sapiens GN=PRKDC PE=1 SV=3 - [PRKDC_HUMAN]       | 41.99 | 4.82  | 17 | 468.8 | 7.12 |
| O75369 | Filamin-B OS=Homo sapiens GN=FLNB PE=1 SV=2 - [FLNB_HUMAN]                                              | 35.08 | 6.96  | 15 | 278.0 | 5.73 |
| P13647 | Keratin, type II cytoskeletal 5 OS=Homo sapiens GN=KRT5 PE=1 SV=3 - [K2C5_HUMAN]                        | 34.01 | 19.15 | 6  | 62.3  | 7.74 |
| P02533 | Keratin, type I cytoskeletal 14 OS=Homo sapiens GN=KRT14 PE=1 SV=4 - [K1C14_HUMAN]                      | 29.77 | 24.79 | 6  | 51.5  | 5.16 |
| Q9UGU0 | Transcription factor 20 OS=Homo sapiens GN=TCF20 PE=1 SV=3 - [TCF20_HUMAN]                              | 28.12 | 8.93  | 13 | 211.6 | 9.04 |
| Q5JSZ5 | Protein PRRC2B OS=Homo sapiens GN=PRRC2B PE=1 SV=2 - [PRC2B_HUMAN]                                      | 26.23 | 4.85  | 6  | 242.8 | 8.34 |
| Q04637 | Eukaryotic translation initiation factor 4 gamma 1 OS=Homo sapiens GN=EIF4G1 PE=1 SV=4 - [IF4G1_HUMAN]  | 26.17 | 5.75  | 7  | 175.4 | 5.33 |
| P02538 | Keratin, type II cytoskeletal 6A OS=Homo sapiens GN=KRT6A PE=1 SV=3 - [K2C6A_HUMAN]                     | 25.53 | 16.49 | 4  | 60.0  | 8.00 |
| Q93008 | Probable ubiquitin carboxyl-terminal hydrolase FAF-X OS=Homo sapiens GN=USP9X PE=1 SV=3 - [USP9X_HUMAN] | 20.12 | 4.09  | 8  | 292.1 | 5.80 |
| Q14444 | Caprin-1 OS=Homo sapiens GN=CAPRIN1 PE=1 SV=2 - [CAPR1_HUMAN]                                           | 19.75 | 15.94 | 9  | 78.3  | 5.25 |
| Q14839 | Chromodomain-helicase-DNA-binding protein 4 OS=Homo sapiens GN=CHD4 PE=1 SV=2 - [CHD4_HUMAN]            | 19.19 | 5.81  | 9  | 217.9 | 5.86 |
| Q9UBX7 | Kallikrein-11 OS=Homo sapiens GN=KLK11 PE=1 SV=2 - [KLK11_HUMAN]                                        | 18.35 | 2.48  | 1  | 31.0  | 8.94 |
| P02768 | Serum albumin OS=Homo sapiens GN=ALB PE=1 SV=2 - [ALBU_HUMAN]                                           | 18.01 | 2.46  | 1  | 69.3  | 6.28 |
| Q5VUA4 | Zinc finger protein 318 OS=Homo sapiens GN=ZNF318 PE=1 SV=2 - [ZN318_HUMAN]                             | 16.72 | 4.43  | 8  | 251.0 | 7.20 |
| P35579 | Myosin-9 OS=Homo sapiens GN=MYH9 PE=1 SV=4 - [MYH9_HUMAN]                                               | 16.66 | 4.08  | 6  | 226.4 | 5.60 |
| Q01844 | RNA-binding protein EWS OS=Homo sapiens GN=EWSR1 PE=1 SV=1 - [EWS_HUMAN]                                | 14.93 | 7.16  | 3  | 68.4  | 9.33 |
| Q12789 | General transcription factor 3C polypeptide 1 OS=Homo sapiens GN=GTF3C1 PE=1 SV=4 - [TF3C1_HUMAN]       | 13.62 | 3.75  | 6  | 238.7 | 7.30 |
| Q9C0C2 | 182 kDa tankyrase-1-binding protein OS=Homo sapiens GN=TNKS1BP1 PE=1 SV=4 - [TB182_HUMAN]               | 13.43 | 5.15  | 6  | 181.7 | 4.86 |
| Q14966 | Zinc finger protein 638 OS=Homo sapiens GN=ZNF638 PE=1 SV=2 - [ZN638_HUMAN]                             | 13.25 | 3.89  | 6  | 220.5 | 6.38 |
| Q9P2E9 | Ribosome-binding protein 1 OS=Homo sapiens GN=RRBP1 PE=1 SV=4 - [RRBP1_HUMAN]                           | 13.07 | 4.96  | 5  | 152.4 | 8.60 |
| P09211 | Glutathione S-transferase P OS=Homo sapiens GN=GSTP1 PE=1 SV=2 - [GSTP1_HUMAN]                          | 11.78 | 9.52  | 1  | 23.3  | 5.64 |
| Q8IWI9 | MAX gene-associated protein OS=Homo sapiens GN=MGA PE=1 SV=3 - [MGAP_HUMAN]                             | 10.43 | 1.85  | 4  | 331.6 | 6.79 |
| Q9ULT8 | E3 ubiquitin-protein ligase HECTD1 OS=Homo sapiens GN=HECTD1 PE=1 SV=3 - [HECD1_HUMAN]                  | 10.30 | 2.61  | 5  | 289.2 | 5.35 |
| Q92576 | PHD finger protein 3 OS=Homo sapiens GN=PHF3 PE=1 SV=3 - [PHF3_HUMAN]                                   | 9.39  | 2.65  | 5  | 229.3 | 6.96 |

|        |                                                                                                                         |      |       |   |       |       |
|--------|-------------------------------------------------------------------------------------------------------------------------|------|-------|---|-------|-------|
| P35658 | Nuclear pore complex protein Nup214 OS=Homo sapiens<br>GN=NUP214 PE=1 SV=2 - [NU214_HUMAN]                              | 7.42 | 2.97  | 5 | 213.5 | 7.47  |
| Q6I9Y2 | THO complex subunit 7 homolog OS=Homo sapiens<br>GN=THOC7 PE=1 SV=3 - [THOC7_HUMAN]                                     | 7.20 | 4.41  | 1 | 23.7  | 5.67  |
| P49792 | E3 SUMO-protein ligase RanBP2 OS=Homo sapiens<br>GN=RANBP2 PE=1 SV=2 - [RBP2_HUMAN]                                     | 6.97 | 1.80  | 3 | 358.0 | 6.20  |
| P51610 | Host cell factor 1 OS=Homo sapiens GN=HCFC1 PE=1 SV=2 -<br>[HCFC1_HUMAN]                                                | 6.89 | 1.38  | 2 | 208.6 | 7.46  |
| Q96N67 | Dedicator of cytokinesis protein 7 OS=Homo sapiens<br>GN=DOCK7 PE=1 SV=4 - [DOCK7_HUMAN]                                | 6.83 | 1.21  | 2 | 242.4 | 6.80  |
| Q13428 | Treacle protein OS=Homo sapiens GN=TCOF1 PE=1 SV=3 -<br>[TCOF_HUMAN]                                                    | 6.72 | 1.55  | 2 | 152.0 | 9.04  |
| P0CG48 | Polyubiquitin-C OS=Homo sapiens GN=UBC PE=1 SV=3 -<br>[UBC_HUMAN]                                                       | 6.71 | 21.02 | 1 | 77.0  | 7.66  |
| A5YKK6 | CCR4-NOT transcription complex subunit 1 OS=Homo sapiens<br>GN=CNOT1 PE=1 SV=2 - [CNOT1_HUMAN]                          | 6.67 | 1.43  | 3 | 266.8 | 7.11  |
| P13637 | Sodium/potassium-transporting ATPase subunit alpha-3<br>OS=Homo sapiens GN=ATP1A3 PE=1 SV=3 -<br>[AT1A3_HUMAN]          | 6.25 | 3.65  | 2 | 111.7 | 5.38  |
| P26641 | Elongation factor 1-gamma OS=Homo sapiens GN=EEF1G<br>PE=1 SV=3 - [EF1G_HUMAN]                                          | 6.15 | 8.01  | 3 | 50.1  | 6.67  |
| Q00839 | Heterogeneous nuclear ribonucleoprotein U OS=Homo<br>sapiens GN=HNRNPU PE=1 SV=6 - [HNRPU_HUMAN]                        | 5.88 | 5.70  | 2 | 90.5  | 6.00  |
| P16615 | Sarcoplasmic/endoplasmic reticulum calcium ATPase 2<br>OS=Homo sapiens GN=ATP2A2 PE=1 SV=1 -<br>[AT2A2_HUMAN]           | 5.76 | 2.50  | 2 | 114.7 | 5.34  |
| Q86YZ3 | Hornerin OS=Homo sapiens GN=HRNR PE=1 SV=2 -<br>[HORN_HUMAN]                                                            | 5.19 | 1.89  | 2 | 282.2 | 10.04 |
| Q9P281 | BAH and coiled-coil domain-containing protein 1 OS=Homo<br>sapiens GN=BAHCC1 PE=1 SV=3 - [BAHC1_HUMAN]                  | 4.98 | 1.19  | 2 | 276.8 | 8.81  |
| P81605 | Dermcidin OS=Homo sapiens GN=DCD PE=1 SV=2 -<br>[DCD_HUMAN]                                                             | 4.89 | 20.00 | 2 | 11.3  | 6.54  |
| Q14204 | Cytoplasmic dynein 1 heavy chain 1 OS=Homo sapiens<br>GN=DYNC1H1 PE=1 SV=5 - [DYHC1_HUMAN]                              | 4.70 | 0.54  | 2 | 532.1 | 6.40  |
| Q7Z6Z7 | E3 ubiquitin-protein ligase HUWE1 OS=Homo sapiens<br>GN=HUWE1 PE=1 SV=3 - [HUWE1_HUMAN]                                 | 4.69 | 0.80  | 2 | 481.6 | 5.22  |
| P54652 | Heat shock-related 70 kDa protein 2 OS=Homo sapiens<br>GN=HSPA2 PE=1 SV=1 - [HSP72_HUMAN]                               | 4.62 | 4.54  | 2 | 70.0  | 5.74  |
| O75643 | U5 small nuclear ribonucleoprotein 200 kDa helicase<br>OS=Homo sapiens GN=SNRNP200 PE=1 SV=2 -<br>[U520_HUMAN]          | 4.16 | 0.98  | 2 | 244.4 | 6.06  |
| O75376 | Nuclear receptor corepressor 1 OS=Homo sapiens<br>GN=NCOR1 PE=1 SV=2 - [NCOR1_HUMAN]                                    | 4.09 | 1.02  | 2 | 270.0 | 7.11  |
| Q9UPU5 | Ubiquitin carboxyl-terminal hydrolase 24 OS=Homo sapiens<br>GN=USP24 PE=1 SV=3 - [UBP24_HUMAN]                          | 3.94 | 0.92  | 2 | 294.2 | 6.14  |
| O43252 | Bifunctional 3'-phosphoadenosine 5'-phosphosulfate synthase<br>1 OS=Homo sapiens GN=PAPSS1 PE=1 SV=2 -<br>[PAPS1_HUMAN] | 3.71 | 2.24  | 1 | 70.8  | 6.86  |
| Q9BY89 | Uncharacterized protein KIAA1671 OS=Homo sapiens<br>GN=KIAA1671 PE=1 SV=2 - [K1671_HUMAN]                               | 3.55 | 1.33  | 2 | 196.6 | 8.47  |
| Q13492 | Phosphatidylinositol-binding clathrin assembly protein<br>OS=Homo sapiens GN=PICALM PE=1 SV=2 -<br>[PICAL_HUMAN]        | 3.36 | 1.84  | 1 | 70.7  | 7.90  |

|        |                                                                                                            |      |      |   |       |      |
|--------|------------------------------------------------------------------------------------------------------------|------|------|---|-------|------|
| O00482 | Nuclear receptor subfamily 5 group A member 2 OS=Homo sapiens GN=NR5A2 PE=1 SV=2 - [NR5A2_HUMAN]           | 3.22 | 6.10 | 1 | 61.3  | 7.88 |
| Q9P2U8 | Vesicular glutamate transporter 2 OS=Homo sapiens GN=SLC17A6 PE=2 SV=1 - [VGLU2_HUMAN]                     | 2.82 | 3.61 | 1 | 64.4  | 7.05 |
| Q92793 | CREB-binding protein OS=Homo sapiens GN=CREBBP PE=1 SV=3 - [CBP_HUMAN]                                     | 2.65 | 0.61 | 1 | 265.2 | 8.53 |
| Q02224 | Centromere-associated protein E OS=Homo sapiens GN=CENPE PE=1 SV=2 - [CENPE_HUMAN]                         | 2.64 | 0.41 | 1 | 316.2 | 5.64 |
| Q66K14 | TBC1 domain family member 9B OS=Homo sapiens GN=TBC1D9B PE=1 SV=3 - [TBC9B_HUMAN]                          | 2.61 | 0.64 | 1 | 140.4 | 5.25 |
| Q6N021 | Methylcytosine dioxygenase TET2 OS=Homo sapiens GN=TET2 PE=1 SV=3 - [TET2_HUMAN]                           | 2.60 | 0.80 | 1 | 223.7 | 7.99 |
| Q9NZB2 | Constitutive coactivator of PPAR-gamma-like protein 1 OS=Homo sapiens GN=FAM120A PE=1 SV=2 - [F120A_HUMAN] | 2.59 | 1.16 | 1 | 121.8 | 8.88 |
| Q9BYP7 | Serine/threonine-protein kinase WNK3 OS=Homo sapiens GN=WNK3 PE=1 SV=3 - [WNK3_HUMAN]                      | 2.59 | 1.61 | 1 | 198.3 | 6.07 |
| B0I1T2 | Unconventional myosin-Ig OS=Homo sapiens GN=MYO1G PE=1 SV=2 - [MYO1G_HUMAN]                                | 2.58 | 3.63 | 1 | 116.4 | 8.73 |
| Q9P2N5 | RNA-binding protein 27 OS=Homo sapiens GN=RBM27 PE=1 SV=2 - [RBM27_HUMAN]                                  | 2.53 | 1.04 | 1 | 118.6 | 9.19 |
| Q4VNC1 | Probable cation-transporting ATPase 13A4 OS=Homo sapiens GN=ATP13A4 PE=2 SV=3 - [AT134_HUMAN]              | 2.42 | 2.51 | 1 | 133.9 | 6.70 |
| Q8NDW8 | Tetratricopeptide repeat protein 21A OS=Homo sapiens GN=TTC21A PE=2 SV=3 - [TT21A_HUMAN]                   | 2.37 | 0.83 | 1 | 150.8 | 7.24 |
| Q00325 | Phosphate carrier protein, mitochondrial OS=Homo sapiens GN=SLC25A3 PE=1 SV=2 - [MPCP_HUMAN]               | 2.31 | 3.31 | 1 | 40.1  | 9.38 |
| Q01082 | Spectrin beta chain, non-erythrocytic 1 OS=Homo sapiens GN=SPTBN1 PE=1 SV=2 - [SPTB2_HUMAN]                | 2.31 | 0.42 | 1 | 274.4 | 5.57 |
| O15320 | cTAGE family member 5 OS=Homo sapiens GN=CTAGE5 PE=1 SV=4 - [CTGE5_HUMAN]                                  | 2.29 | 1.74 | 1 | 90.9  | 5.22 |
| Q9ULL5 | Proline-rich protein 12 OS=Homo sapiens GN=PRR12 PE=1 SV=2 - [PRR12_HUMAN]                                 | 2.20 | 0.91 | 1 | 129.9 | 8.00 |
| Q92499 | ATP-dependent RNA helicase DDX1 OS=Homo sapiens GN=DDX1 PE=1 SV=2 - [DDX1_HUMAN]                           | 2.19 | 1.35 | 1 | 82.4  | 7.23 |
| Q13085 | Acetyl-CoA carboxylase 1 OS=Homo sapiens GN=ACACA PE=1 SV=2 - [ACACA_HUMAN]                                | 2.18 | 0.47 | 1 | 265.4 | 6.37 |
| O60779 | Thiamine transporter 1 OS=Homo sapiens GN=SLC19A2 PE=1 SV=2 - [S19A2_HUMAN]                                | 2.16 | 2.21 | 1 | 55.4  | 6.74 |
| Q9Y4C1 | Lysine-specific demethylase 3A OS=Homo sapiens GN=KDM3A PE=1 SV=4 - [KDM3A_HUMAN]                          | 2.16 | 0.98 | 1 | 147.2 | 8.07 |
| Q96AY4 | Tetratricopeptide repeat protein 28 OS=Homo sapiens GN=TTC28 PE=1 SV=4 - [TTC28_HUMAN]                     | 2.12 | 0.52 | 1 | 270.7 | 6.89 |
| Q96EV2 | RNA-binding protein 33 OS=Homo sapiens GN=RBM33 PE=1 SV=3 - [RBM33_HUMAN]                                  | 1.96 | 1.11 | 1 | 129.9 | 6.93 |
| Q14678 | KN motif and ankyrin repeat domain-containing protein 1 OS=Homo sapiens GN=KANK1 PE=1 SV=3 - [KANK1_HUMAN] | 1.96 | 0.67 | 1 | 147.2 | 5.30 |
| Q7Z333 | Probable helicase senataxin OS=Homo sapiens GN=SETX PE=1 SV=4 - [SETX_HUMAN]                               | 1.90 | 0.49 | 1 | 302.7 | 7.17 |
| Q14008 | Cytoskeleton-associated protein 5 OS=Homo sapiens GN=CKAP5 PE=1 SV=3 - [CKAP5_HUMAN]                       | 1.84 | 0.84 | 2 | 225.4 | 7.80 |
| P51587 | Breast cancer type 2 susceptibility protein OS=Homo sapiens GN=BRCA2 PE=1 SV=2 - [BRCA2_HUMAN]             | 1.84 | 0.35 | 1 | 384.0 | 6.73 |



|        |                                                                                                             |      |      |   |       |      |
|--------|-------------------------------------------------------------------------------------------------------------|------|------|---|-------|------|
| P68543 | UBX domain-containing protein 2A OS=Homo sapiens<br>GN=UBXN2A PE=2 SV=1 - [UBX2A_HUMAN]                     | 1.81 | 3.09 | 1 | 29.3  | 6.25 |
| Q9BXT5 | Testis-expressed sequence 15 protein OS=Homo sapiens<br>GN=TEX15 PE=2 SV=2 - [TEX15_HUMAN]                  | 1.79 | 0.25 | 1 | 315.1 | 6.19 |
| P51114 | Fragile X mental retardation syndrome-related protein 1<br>OS=Homo sapiens GN=FXR1 PE=1 SV=3 - [FXR1_HUMAN] | 1.79 | 2.58 | 2 | 69.7  | 6.15 |
| Q15233 | Non-POU domain-containing octamer-binding protein<br>OS=Homo sapiens GN=NONO PE=1 SV=4 - [NONO_HUMAN]       | 1.73 | 2.97 | 1 | 54.2  | 8.95 |
| Q9BWW2 | Spermatogenesis-associated protein 9 OS=Homo sapiens<br>GN=SPATA9 PE=2 SV=2 - [SPAT9_HUMAN]                 | 1.72 | 2.76 | 1 | 28.7  | 9.48 |
| O15016 | Tripartite motif-containing protein 66 OS=Homo sapiens<br>GN=TRIM66 PE=2 SV=4 - [TRI66_HUMAN]               | 1.70 | 0.49 | 1 | 134.6 | 6.98 |
| Q8NI27 | THO complex subunit 2 OS=Homo sapiens GN=THOC2 PE=1<br>SV=2 - [THOC2_HUMAN]                                 | 1.70 | 0.56 | 1 | 182.7 | 8.44 |
| P09001 | 39S ribosomal protein L3, mitochondrial OS=Homo sapiens<br>GN=MRPL3 PE=1 SV=1 - [RM03_HUMAN]                | 1.67 | 2.59 | 1 | 38.6  | 9.48 |
| O75899 | Gamma-aminobutyric acid type B receptor subunit 2<br>OS=Homo sapiens GN=GABBR2 PE=1 SV=1 -<br>[GABR2_HUMAN] | 1.67 | 0.85 | 1 | 105.8 | 8.66 |
| Q9Y6N7 | Roundabout homolog 1 OS=Homo sapiens GN=ROBO1 PE=1<br>SV=1 - [ROBO1_HUMAN]                                  | 1.65 | 0.79 | 1 | 180.8 | 6.04 |
| O60423 | Phospholipid-transporting ATPase IK OS=Homo sapiens<br>GN=ATP8B3 PE=2 SV=4 - [AT8B3_HUMAN]                  | 0.00 | 0.54 | 1 | 146.7 | 7.90 |
| P36406 | E3 ubiquitin-protein ligase TRIM23 OS=Homo sapiens<br>GN=TRIM23 PE=1 SV=1 - [TRI23_HUMAN]                   | 0.00 | 1.22 | 1 | 64.0  | 6.38 |
| Q13459 | Unconventional myosin-IXb OS=Homo sapiens GN=MYO9B<br>PE=1 SV=3 - [MYO9B_HUMAN]                             | 0.00 | 0.42 | 1 | 243.2 | 8.75 |
| Q6ZRS4 | Coiled-coil domain-containing protein 129 OS=Homo sapiens<br>GN=CCDC129 PE=2 SV=2 - [CC129_HUMAN]           | 0.00 | 0.96 | 1 | 115.3 | 5.31 |
| Q7RTP6 | Protein-methionine sulfoxide oxidase MICAL3 OS=Homo<br>sapiens GN=MICAL3 PE=1 SV=2 - [MICA3_HUMAN]          | 0.00 | 0.40 | 1 | 224.2 | 5.55 |
| Q8WW22 | DnaJ homolog subfamily A member 4 OS=Homo sapiens<br>GN=DNAJA4 PE=1 SV=1 - [DNJA4_HUMAN]                    | 0.00 | 5.29 | 1 | 44.8  | 7.59 |
| Q9BYW2 | Histone-lysine N-methyltransferase SETD2 OS=Homo sapiens<br>GN=SETD2 PE=1 SV=3 - [SETD2_HUMAN]              | 0.00 | 0.59 | 1 | 287.4 | 6.14 |
| Q9UBC5 | Unconventional myosin-Ia OS=Homo sapiens GN=MYO1A<br>PE=1 SV=1 - [MYO1A_HUMAN]                              | 0.00 | 0.58 | 1 | 118.3 | 9.31 |

**Supplementary Table 2.** The list and sequence of peptides with different histone PTMs used in FMRP-1-200 peptide array.

|                     |                     |                     |                     |                     |                     |                     |                     |                     |                      |                      |                      |                      |                      |                      |                      |                      |                      |                      |                      |                      |                      |                      |                      |     |     |     |     |     |     |     |     |     |      |      |      |      |      |      |      |      |      |      |      |      |      |      |      |  |  |
|---------------------|---------------------|---------------------|---------------------|---------------------|---------------------|---------------------|---------------------|---------------------|----------------------|----------------------|----------------------|----------------------|----------------------|----------------------|----------------------|----------------------|----------------------|----------------------|----------------------|----------------------|----------------------|----------------------|----------------------|-----|-----|-----|-----|-----|-----|-----|-----|-----|------|------|------|------|------|------|------|------|------|------|------|------|------|------|------|--|--|
| <a href="#">A 1</a> | <a href="#">A 2</a> | <a href="#">A 3</a> | <a href="#">A 4</a> | <a href="#">A 5</a> | <a href="#">A 6</a> | <a href="#">A 7</a> | <a href="#">A 8</a> | <a href="#">A 9</a> | <a href="#">A 10</a> | <a href="#">A 11</a> | <a href="#">A 12</a> | <a href="#">A 13</a> | <a href="#">A 14</a> | <a href="#">A 15</a> | <a href="#">A 16</a> | <a href="#">A 17</a> | <a href="#">A 18</a> | <a href="#">A 19</a> | <a href="#">A 20</a> | <a href="#">A 21</a> | <a href="#">A 22</a> | <a href="#">A 23</a> | <a href="#">A 24</a> | A 1 | A 2 | A 3 | A 4 | A 5 | A 6 | A 7 | A 8 | A 9 | A 10 | A 11 | A 12 | A 13 | A 14 | A 15 | A 16 | A 17 | A 18 | A 19 | A 20 | A 21 | A 22 | A 23 | A 24 |  |  |
| <a href="#">B 1</a> | <a href="#">B 2</a> | <a href="#">B 3</a> | <a href="#">B 4</a> | <a href="#">B 5</a> | <a href="#">B 6</a> | <a href="#">B 7</a> | <a href="#">B 8</a> | <a href="#">B 9</a> | <a href="#">B 10</a> | <a href="#">B 11</a> | <a href="#">B 12</a> | <a href="#">B 13</a> | <a href="#">B 14</a> | <a href="#">B 15</a> | <a href="#">B 16</a> | <a href="#">B 17</a> | <a href="#">B 18</a> | <a href="#">B 19</a> | <a href="#">B 20</a> | <a href="#">B 21</a> | <a href="#">B 22</a> | <a href="#">B 23</a> | <a href="#">B 24</a> | B 2 | B 2 | B 3 | B 4 | B 5 | B 6 | B 7 | B 8 | B 9 | B 10 | B 11 | B 12 | B 13 | B 14 | B 15 | B 16 | B 17 | B 18 | B 19 | B 20 | B 21 | B 22 | B 23 | B 24 |  |  |
| <a href="#">C 1</a> | <a href="#">C 2</a> | <a href="#">C 3</a> | <a href="#">C 4</a> | <a href="#">C 5</a> | <a href="#">C 6</a> | <a href="#">C 7</a> | <a href="#">C 8</a> | <a href="#">C 9</a> | <a href="#">C 10</a> | <a href="#">C 11</a> | <a href="#">C 12</a> | <a href="#">C 13</a> | <a href="#">C 14</a> | <a href="#">C 15</a> | <a href="#">C 16</a> | <a href="#">C 17</a> | <a href="#">C 18</a> | <a href="#">C 19</a> | <a href="#">C 20</a> | <a href="#">C 21</a> | <a href="#">C 22</a> | <a href="#">C 23</a> | <a href="#">C 24</a> | C 1 | C 2 | C 3 | C 4 | C 5 | C 6 | C 7 | C 8 | C 9 | C 10 | C 11 | C 12 | C 13 | C 14 | C 15 | C 16 | C 17 | C 18 | C 19 | C 20 | C 21 | C 22 | C 23 | C 24 |  |  |
| <a href="#">D 1</a> | <a href="#">D 2</a> | <a href="#">D 3</a> | <a href="#">D 4</a> | <a href="#">D 5</a> | <a href="#">D 6</a> | <a href="#">D 7</a> | <a href="#">D 8</a> | <a href="#">D 9</a> | <a href="#">D 10</a> | <a href="#">D 11</a> | <a href="#">D 12</a> | <a href="#">D 13</a> | <a href="#">D 14</a> | <a href="#">D 15</a> | <a href="#">D 16</a> | <a href="#">D 17</a> | <a href="#">D 18</a> | <a href="#">D 19</a> | <a href="#">D 20</a> | <a href="#">D 21</a> | <a href="#">D 22</a> | <a href="#">D 23</a> | <a href="#">D 24</a> | D 1 | D 2 | D 3 | D 4 | D 5 | D 6 | D 7 | D 8 | D 9 | D 10 | D 11 | D 12 | D 13 | D 14 | D 15 | D 16 | D 17 | D 18 | D 19 | D 20 | D 21 | D 22 | D 23 | D 24 |  |  |
| <a href="#">E 1</a> | <a href="#">E 2</a> | <a href="#">E 3</a> | <a href="#">E 4</a> | <a href="#">E 5</a> | <a href="#">E 6</a> | <a href="#">E 7</a> | <a href="#">E 8</a> | <a href="#">E 9</a> | <a href="#">E 10</a> | <a href="#">E 11</a> | <a href="#">E 12</a> | <a href="#">E 13</a> | <a href="#">E 14</a> | <a href="#">E 15</a> | <a href="#">E 16</a> | <a href="#">E 17</a> | <a href="#">E 18</a> | <a href="#">E 19</a> | <a href="#">E 20</a> | <a href="#">E 21</a> | <a href="#">E 22</a> | <a href="#">E 23</a> | <a href="#">E 24</a> | E 1 | E 2 | E 3 | E 4 | E 5 | E 6 | E 7 | E 8 | E 9 | E 10 | E 11 | E 12 | E 13 | E 14 | E 15 | E 16 | E 17 | E 18 | E 19 | E 20 | E 21 | E 22 | E 23 | E 24 |  |  |
| <a href="#">F 1</a> | <a href="#">F 2</a> | <a href="#">F 3</a> | <a href="#">F 4</a> | <a href="#">F 5</a> | <a href="#">F 6</a> | <a href="#">F 7</a> | <a href="#">F 8</a> | <a href="#">F 9</a> | <a href="#">F 10</a> | <a href="#">F 11</a> | <a href="#">F 12</a> | <a href="#">F 13</a> | <a href="#">F 14</a> | <a href="#">F 15</a> | <a href="#">F 16</a> | <a href="#">F 17</a> | <a href="#">F 18</a> | <a href="#">F 19</a> | <a href="#">F 20</a> | <a href="#">F 21</a> | <a href="#">F 22</a> | <a href="#">F 23</a> | <a href="#">F 24</a> | F 1 | F 2 | F 3 | F 4 | F 5 | F 6 | F 7 | F 8 | F 9 | F 10 | F 11 | F 12 | F 13 | F 14 | F 15 | F 16 | F 17 | F 18 | F 19 | F 20 | F 21 | F 22 | F 23 | F 24 |  |  |
| <a href="#">G 1</a> | <a href="#">G 2</a> | <a href="#">G 3</a> | <a href="#">G 4</a> | <a href="#">G 5</a> | <a href="#">G 6</a> | <a href="#">G 7</a> | <a href="#">G 8</a> | <a href="#">G 9</a> | <a href="#">G 10</a> | <a href="#">G 11</a> | <a href="#">G 12</a> | <a href="#">G 13</a> | <a href="#">G 14</a> | <a href="#">G 15</a> | <a href="#">G 16</a> | <a href="#">G 17</a> | <a href="#">G 18</a> | <a href="#">G 19</a> | <a href="#">G 20</a> | <a href="#">G 21</a> | <a href="#">G 22</a> | <a href="#">G 23</a> | <a href="#">G 24</a> | G 1 | G 2 | G 3 | G 4 | G 5 | G 6 | G 7 | G 8 | G 9 | G 10 | G 11 | G 12 | G 13 | G 14 | G 15 | G 16 | G 17 | G 18 | G 19 | G 20 | G 21 | G 22 | G 23 | G 24 |  |  |
| <a href="#">H 1</a> | <a href="#">H 2</a> | <a href="#">H 3</a> | <a href="#">H 4</a> | <a href="#">H 5</a> | <a href="#">H 6</a> | <a href="#">H 7</a> | <a href="#">H 8</a> | <a href="#">H 9</a> | <a href="#">H 10</a> | <a href="#">H 11</a> | <a href="#">H 12</a> | <a href="#">H 13</a> | <a href="#">H 14</a> | <a href="#">H 15</a> | <a href="#">H 16</a> | <a href="#">H 17</a> | <a href="#">H 18</a> | <a href="#">H 19</a> | <a href="#">H 20</a> | <a href="#">H 21</a> | <a href="#">H 22</a> | <a href="#">H 23</a> | <a href="#">H 24</a> | H 1 | H 2 | H 3 | H 4 | H 5 | H 6 | H 7 | H 8 | H 9 | H 10 | H 11 | H 12 | H 13 | H 14 | H 15 | H 16 | H 17 | H 18 | H 19 | H 20 | H 21 | H 22 | H 23 | H 24 |  |  |
| <a href="#">I 1</a> | <a href="#">I 2</a> | <a href="#">I 3</a> | <a href="#">I 4</a> | <a href="#">I 5</a> | <a href="#">I 6</a> | <a href="#">I 7</a> | <a href="#">I 8</a> | <a href="#">I 9</a> | <a href="#">I 10</a> | <a href="#">I 11</a> | <a href="#">I 12</a> | <a href="#">I 13</a> | <a href="#">I 14</a> | <a href="#">I 15</a> | <a href="#">I 16</a> | <a href="#">I 17</a> | <a href="#">I 18</a> | <a href="#">I 19</a> | <a href="#">I 20</a> | <a href="#">I 21</a> | <a href="#">I 22</a> | <a href="#">I 23</a> | <a href="#">I 24</a> | I 1 | I 2 | I 3 | I 4 | I 5 | I 6 | I 7 | I 8 | I 9 | I 10 | I 11 | I 12 | I 13 | I 14 | I 15 | I 16 | I 17 | I 18 | I 19 | I 20 | I 21 | I 22 | I 23 | I 24 |  |  |
| <a href="#">J 1</a> | <a href="#">J 2</a> | <a href="#">J 3</a> | <a href="#">J 4</a> | <a href="#">J 5</a> | <a href="#">J 6</a> | <a href="#">J 7</a> | <a href="#">J 8</a> | <a href="#">J 9</a> | <a href="#">J 10</a> | <a href="#">J 11</a> | <a href="#">J 12</a> | <a href="#">J 13</a> | <a href="#">J 14</a> | <a href="#">J 15</a> | <a href="#">J 16</a> | <a href="#">J 17</a> | <a href="#">J 18</a> | <a href="#">J 19</a> | <a href="#">J 20</a> | <a href="#">J 21</a> | <a href="#">J 22</a> | <a href="#">J 23</a> | <a href="#">J 24</a> | J 1 | J 2 | J 3 | J 4 | J 5 | J 6 | J 7 | J 8 | J 9 | J 10 | J 11 | J 12 | J 13 | J 14 | J 15 | J 16 | J 17 | J 18 | J 19 | J 20 | J 21 | J 22 | J 23 | J 24 |  |  |
| <a href="#">K 1</a> | <a href="#">K 2</a> | <a href="#">K 3</a> | <a href="#">K 4</a> | <a href="#">K 5</a> | <a href="#">K 6</a> | <a href="#">K 7</a> | <a href="#">K 8</a> | <a href="#">K 9</a> | <a href="#">K 10</a> | <a href="#">K 11</a> | <a href="#">K 12</a> | <a href="#">K 13</a> | <a href="#">K 14</a> | <a href="#">K 15</a> | <a href="#">K 16</a> | <a href="#">K 17</a> | <a href="#">K 18</a> | <a href="#">K 19</a> | <a href="#">K 20</a> | <a href="#">K 21</a> | <a href="#">K 22</a> | <a href="#">K 23</a> | <a href="#">K 24</a> | K 1 | K 2 | K 3 | K 4 | K 5 | K 6 | K 7 | K 8 | K 9 | K 10 | K 11 | K 12 | K 13 | K 14 | K 15 | K 16 | K 17 | K 18 | K 19 | K 20 | K 21 | K 22 | K 23 | K 24 |  |  |
| <a href="#">L 1</a> | <a href="#">L 2</a> | <a href="#">L 3</a> | <a href="#">L 4</a> | <a href="#">L 5</a> | <a href="#">L 6</a> | <a href="#">L 7</a> | <a href="#">L 8</a> | <a href="#">L 9</a> | <a href="#">L 10</a> | <a href="#">L 11</a> | <a href="#">L 12</a> | <a href="#">L 13</a> | <a href="#">L 14</a> | <a href="#">L 15</a> | <a href="#">L 16</a> | <a href="#">L 17</a> | <a href="#">L 18</a> | <a href="#">L 19</a> | <a href="#">L 20</a> | <a href="#">L 21</a> | <a href="#">L 22</a> | <a href="#">L 23</a> | <a href="#">L 24</a> | L 1 | L 2 | L 3 | L 4 | L 5 | L 6 | L 7 | L 8 | L 9 | L 10 | L 11 | L 12 | L 13 | L 14 | L 15 | L 16 | L 17 | L 18 | L 19 | L 20 | L 21 | L 22 | L 23 | L 24 |  |  |
| <a href="#">M 1</a> | <a href="#">M 2</a> | <a href="#">M 3</a> | <a href="#">M 4</a> | <a href="#">M 5</a> | <a href="#">M 6</a> | <a href="#">M 7</a> | <a href="#">M 8</a> | <a href="#">M 9</a> | <a href="#">M 10</a> | <a href="#">M 11</a> | <a href="#">M 12</a> | <a href="#">M 13</a> | <a href="#">M 14</a> | <a href="#">M 15</a> | <a href="#">M 16</a> | <a href="#">M 17</a> | <a href="#">M 18</a> | <a href="#">M 19</a> | <a href="#">M 20</a> | <a href="#">M 21</a> | <a href="#">M 22</a> | <a href="#">M 23</a> | <a href="#">M 24</a> | M 1 | M 2 | M 3 | M 4 | M 5 | M 6 | M 7 | M 8 | M 9 | M 10 | M 11 | M 12 | M 13 | M 14 | M 15 | M 16 | M 17 | M 18 | M 19 | M 20 | M 21 | M 22 | M 23 | M 24 |  |  |
| <a href="#">N 1</a> | <a href="#">N 2</a> | <a href="#">N 3</a> | <a href="#">N 4</a> | <a href="#">N 5</a> | <a href="#">N 6</a> | <a href="#">N 7</a> | <a href="#">N 8</a> | <a href="#">N 9</a> | <a href="#">N 10</a> | <a href="#">N 11</a> | <a href="#">N 12</a> | <a href="#">N 13</a> | <a href="#">N 14</a> | <a href="#">N 15</a> | <a href="#">N 16</a> | <a href="#">N 17</a> | <a href="#">N 18</a> | <a href="#">N 19</a> | <a href="#">N 20</a> | <a href="#">N 21</a> | <a href="#">N 22</a> | <a href="#">N 23</a> | <a href="#">N 24</a> | N 1 | N 2 | N 3 | N 4 | N 5 | N 6 | N 7 | N 8 | N 9 | N 10 | N 11 | N 12 | N 13 | N 14 | N 15 | N 16 | N 17 | N 18 | N 19 | N 20 | N 21 | N 22 | N 23 | N 24 |  |  |
| <a href="#">O 1</a> | <a href="#">O 2</a> | <a href="#">O 3</a> | <a href="#">O 4</a> | <a href="#">O 5</a> | <a href="#">O 6</a> | <a href="#">O 7</a> | <a href="#">O 8</a> | <a href="#">O 9</a> | <a href="#">O 10</a> | <a href="#">O 11</a> | <a href="#">O 12</a> | <a href="#">O 13</a> | <a href="#">O 14</a> | <a href="#">O 15</a> | <a href="#">O 16</a> | <a href="#">O 17</a> | <a href="#">O 18</a> | <a href="#">O 19</a> | <a href="#">O 20</a> | <a href="#">O 21</a> | <a href="#">O 22</a> | <a href="#">O 23</a> | <a href="#">O 24</a> | O 1 | O 2 | O 3 | O 4 | O 5 | O 6 | O 7 | O 8 | O 9 | O 10 | O 11 | O 12 | O 13 | O 14 | O 15 | O 16 | O 17 | O 18 | O 19 | O 20 | O 21 | O 22 | O 23 | O 24 |  |  |
| <a href="#">P 1</a> | <a href="#">P 2</a> | <a href="#">P 3</a> | <a href="#">P 4</a> | <a href="#">P 5</a> | <a href="#">P 6</a> | <a href="#">P 7</a> | <a href="#">P 8</a> | <a href="#">P 9</a> | <a href="#">P 10</a> | <a href="#">P 11</a> | <a href="#">P 12</a> | <a href="#">P 13</a> | <a href="#">P 14</a> | <a href="#">P 15</a> | <a href="#">P 16</a> | <a href="#">P 17</a> | <a href="#">P 18</a> | <a href="#">P 19</a> | <a href="#">P 20</a> | <a href="#">P 21</a> | <a href="#">P 22</a> | <a href="#">P 23</a> | <a href="#">P 24</a> | P 1 | P 2 | P 3 | P 4 | P 5 | P 6 | P 7 | P 8 | P 9 | P 10 | P 11 | P 12 | P 13 | P 14 | P 15 | P 16 | P 17 | P 18 | P 19 | P 20 | P 21 | P 22 | P 23 | P 24 |  |  |
|                     |                     |                     |                     |                     |                     |                     |                     |                     |                      |                      |                      |                      |                      |                      |                      |                      |                      |                      |                      |                      |                      |                      |                      |     |     |     |     |     |     |     |     |     |      |      |      |      |      |      |      |      |      |      |      |      |      |      |      |  |  |

**CelluSpots™**  
 LOT: XXXXXX-XXX

**bold font = link to peptide sequence**

normal font = hold mouse over postion and the peptide sequence will show up after a while

**Active Motif**  
**Modified™ Histone Peptide Array\***  
**Catalog Nos. 13001 & 13005**

| Modification number | Peptide location | Peptide sequence                              | to array | name    | Mod1   | Mod2  | Mod3  | Mod4 | N-terminus |
|---------------------|------------------|-----------------------------------------------|----------|---------|--------|-------|-------|------|------------|
| 1                   | A 1              | A R T K Q T A R K S T G G K A P R K Q         | ▶        | H3 1-19 | unmod  |       |       |      | free       |
| 2                   | A 2              | A Rme2s T K Q T A R K S T G G K A P R K Q     | ▶        | H3 1-19 | R2me2s |       |       |      | free       |
| 3                   | A 3              | A Rme2a T K Q T A R K S T G G K A P R K Q     | ▶        | H3 1-19 | R2me2a |       |       |      | free       |
| 4                   | A 4              | A Cit T K Q T A R K S T G G K A P R K Q       | ▶        | H3 1-19 | R2Citr |       |       |      | free       |
| 5                   | A 5              | A R pT K Q T A R K S T G G K A P R K Q        | ▶        | H3 1-19 | T3P    |       |       |      | free       |
| 6                   | A 6              | A R T Kme1 Q T A R K S T G G K A P R K Q      | ▶        | H3 1-19 | K4me1  |       |       |      | free       |
| 7                   | A 7              | A R T Kme2 Q T A R K S T G G K A P R K Q      | ▶        | H3 1-19 | K4me2  |       |       |      | free       |
| 8                   | A 8              | A R T Kme3 Q T A R K S T G G K A P R K Q      | ▶        | H3 1-19 | K4me3  |       |       |      | free       |
| 9                   | A 9              | A R T Kac Q T A R K S T G G K A P R K Q       | ▶        | H3 1-19 | K4ac   |       |       |      | free       |
| 10                  | A10              | A R T K Q T A Rme2s K S T G G K A P R K Q     | ▶        | H3 1-19 | R8me2s |       |       |      | free       |
| 11                  | A11              | A R T K Q T A Rme2a K S T G G K A P R K Q     | ▶        | H3 1-19 | R8me2a |       |       |      | free       |
| 12                  | A12              | A R T K Q T A Cit K S T G G K A P R K Q       | ▶        | H3 1-19 | R8Citr |       |       |      | free       |
| 13                  | A13              | A R T K Q T A R Kme1 S T G G K A P R K Q      | ▶        | H3 1-19 | K9me1  |       |       |      | free       |
| 14                  | A14              | A R T K Q T A R Kme2 S T G G K A P R K Q      | ▶        | H3 1-19 | K9me2  |       |       |      | free       |
| 15                  | A15              | A R T K Q T A R Kme3 S T G G K A P R K Q      | ▶        | H3 1-19 | K9me3  |       |       |      | free       |
| 16                  | A16              | A R T K Q T A R Kac S T G G K A P R K Q       | ▶        | H3 1-19 | K9ac   |       |       |      | free       |
| 17                  | A17              | A R T K Q T A R K pS T G G K A P R K Q        | ▶        | H3 1-19 | S10P   |       |       |      | free       |
| 18                  | A18              | A R T K Q T A R K pT G G K A P R K Q          | ▶        | H3 1-19 | T11P   |       |       |      | free       |
| 19                  | A19              | A R T K Q T A R K S T G G Kac A P R K Q       | ▶        | H3 1-19 | K14ac  |       |       |      | free       |
| 20                  | A20              | A Rme2s pT K Q T A R K S T G G K A P R K Q    | ▶        | H3 1-19 | R2me2s | T3P   |       |      | free       |
| 21                  | A21              | A Rme2s T Kme1 Q T A R K S T G G K A P R K Q  | ▶        | H3 1-19 | R2me2s | K4me1 |       |      | free       |
| 22                  | A22              | A Rme2s T Kme2 Q T A R K S T G G K A P R K Q  | ▶        | H3 1-19 | R2me2s | K4me2 |       |      | free       |
| 23                  | A23              | A Rme2s T Kme3 Q T A R K S T G G K A P R K Q  | ▶        | H3 1-19 | R2me2s | K4me3 |       |      | free       |
| 24                  | A24              | A Rme2s T Kac Q T A R K S T G G K A P R K Q   | ▶        | H3 1-19 | R2me2s | K4ac  |       |      | free       |
| 25                  | B 1              | A Rme2a pT K Q T A R K S T G G K A P R K Q    | ▶        | H3 1-19 | R2me2a | T3P   |       |      | free       |
| 26                  | B 2              | A Rme2a T Kme1 Q T A R K S T G G K A P R K Q  | ▶        | H3 1-19 | R2me2a | K4me1 |       |      | free       |
| 27                  | B 3              | A Rme2a T Kme2 Q T A R K S T G G K A P R K Q  | ▶        | H3 1-19 | R2me2a | K4me2 |       |      | free       |
| 28                  | B 4              | A Rme2a T Kme3 Q T A R K S T G G K A P R K Q  | ▶        | H3 1-19 | R2me2a | K4me3 |       |      | free       |
| 29                  | B 5              | A Rme2a T Kac Q T A R K S T G G K A P R K Q   | ▶        | H3 1-19 | R2me2a | K4ac  |       |      | free       |
| 30                  | B 6              | A Cit pT K Q T A R K S T G G K A P R K Q      | ▶        | H3 1-19 | R2Citr | T3P   |       |      | free       |
| 31                  | B 7              | A Cit T Kme1 Q T A R K S T G G K A P R K Q    | ▶        | H3 1-19 | R2Citr | K4me1 |       |      | free       |
| 32                  | B 8              | A Cit T Kme2 Q T A R K S T G G K A P R K Q    | ▶        | H3 1-19 | R2Citr | K4me2 |       |      | free       |
| 33                  | B 9              | A Cit T Kme3 Q T A R K S T G G K A P R K Q    | ▶        | H3 1-19 | R2Citr | K4me3 |       |      | free       |
| 34                  | B10              | A Cit T Kac Q T A R K S T G G K A P R K Q     | ▶        | H3 1-19 | R2Citr | K4ac  |       |      | free       |
| 35                  | B11              | A R pT Kme1 Q T A R K S T G G K A P R K Q     | ▶        | H3 1-19 | T3P    | K4me1 |       |      | free       |
| 36                  | B12              | A R pT Kme2 Q T A R K S T G G K A P R K Q     | ▶        | H3 1-19 | T3P    | K4me2 |       |      | free       |
| 37                  | B13              | A R pT Kme3 Q T A R K S T G G K A P R K Q     | ▶        | H3 1-19 | T3P    | K4me3 |       |      | free       |
| 38                  | B14              | A R pT Kac Q T A R K S T G G K A P R K Q      | ▶        | H3 1-19 | T3P    | K4ac  |       |      | free       |
| 39                  | B15              | A Rme2s pT Kme1 Q T A R K S T G G K A P R K Q | ▶        | H3 1-19 | R2me2s | T3P   | K4me1 |      | free       |
| 40                  | B16              | A Rme2s pT Kme2 Q T A R K S T G G K A P R K Q | ▶        | H3 1-19 | R2me2s | T3P   | K4me2 |      | free       |
| 41                  | B17              | A Rme2s pT Kme3 Q T A R K S T G G K A P R K Q | ▶        | H3 1-19 | R2me2s | T3P   | K4me3 |      | free       |
| 42                  | B18              | A Rme2s pT Kac Q T A R K S T G G K A P R K Q  | ▶        | H3 1-19 | R2me2s | T3P   | K4ac  |      | free       |
| 43                  | B19              | A Rme2a pT Kme1 Q T A R K S T G G K A P R K Q | ▶        | H3 1-19 | R2me2a | T3P   | K4me1 |      | free       |
| 44                  | B20              | A Rme2a pT Kme2 Q T A R K S T G G K A P R K Q | ▶        | H3 1-19 | R2me2a | T3P   | K4me2 |      | free       |
| 45                  | B21              | A Rme2a pT Kme3 Q T A R K S T G G K A P R K Q | ▶        | H3 1-19 | R2me2a | T3P   | K4me3 |      | free       |
| 46                  | B22              | A Rme2a pT Kac Q T A R K S T G G K A P R K Q  | ▶        | H3 1-19 | R2me2a | T3P   | K4ac  |      | free       |
| 47                  | B23              | A R T K Q T A Rme2a Kme1 S T G G K A P R K Q  | ▶        | H3 1-19 | R8me2s | K9me1 |       |      | free       |
| 48                  | B24              | A R T K Q T A Rme2a Kme2 S T G G K A P R K Q  | ▶        | H3 1-19 | R8me2s | K9me2 |       |      | free       |
| 49                  | C 1              | A R T K Q T A Rme2a Kme3 S T G G K A P R K Q  | ▶        | H3 1-19 | R8me2s | K9me3 |       |      | free       |
| 50                  | C 2              | A R T K Q T A Rme2a Kac S T G G K A P R K Q   | ▶        | H3 1-19 | R8me2s | K9ac  |       |      | free       |
| 51                  | C 3              | A R T K Q T A Rme2a K pS T G G K A P R K Q    | ▶        | H3 1-19 | R8me2s | S10P  |       |      | free       |
| 52                  | C 4              | A R T K Q T A Rme2a K pT G G K A P R K Q      | ▶        | H3 1-19 | R8me2s | T11P  |       |      | free       |
| 53                  | C 5              | A R T K Q T A Rme2a Kme1 S T G G K A P R K Q  | ▶        | H3 1-19 | R8me2a | K9me1 |       |      | free       |
| 54                  | C 6              | A R T K Q T A Rme2a Kme2 S T G G K A P R K Q  | ▶        | H3 1-19 | R8me2a | K9me2 |       |      | free       |
| 55                  | C 7              | A R T K Q T A Rme2a Kme3 S T G G K A P R K Q  | ▶        | H3 1-19 | R8me2a | K9me3 |       |      | free       |
| 56                  | C 8              | A R T K Q T A Rme2a Kac S T G G K A P R K Q   | ▶        | H3 1-19 | R8me2a | K9ac  |       |      | free       |
| 57                  | C 9              | A R T K Q T A Rme2a K pS T G G K A P R K Q    | ▶        | H3 1-19 | R8me2a | S10P  |       |      | free       |
| 58                  | C10              | A R T K Q T A Rme2a K pT G G K A P R K Q      | ▶        | H3 1-19 | R8me2a | T11P  |       |      | free       |
| 59                  | C11              | A R T K Q T A Cit Kme1 S T G G K A P R K Q    | ▶        | H3 1-19 | R8Citr | K9me1 |       |      | free       |
| 60                  | C12              | A R T K Q T A Cit Kme2 S T G G K A P R K Q    | ▶        | H3 1-19 | R8Citr | K9me2 |       |      | free       |
| 61                  | C13              | A R T K Q T A Cit Kme3 S T G G K A P R K Q    | ▶        | H3 1-19 | R8Citr | K9me3 |       |      | free       |
| 62                  | C14              | A R T K Q T A Cit Kac S T G G K A P R K Q     | ▶        | H3 1-19 | R8Citr | K9ac  |       |      | free       |
| 63                  | C15              | A R T K Q T A Cit K pS T G G K A P R K Q      | ▶        | H3 1-19 | R8Citr | S10P  |       |      | free       |
| 64                  | C16              | A R T K Q T A Cit K pT G G K A P R K Q        | ▶        | H3 1-19 | R8Citr | T11P  |       |      | free       |
| 65                  | C17              | A R T K Q T A R Kme1 pS T G G K A P R K Q     | ▶        | H3 1-19 | K9me1  | S10P  |       |      | free       |
| 66                  | C18              | A R T K Q T A R Kme1 S pT G G K A P R K Q     | ▶        | H3 1-19 | K9me1  | T11P  |       |      | free       |
| 67                  | C19              | A R T K Q T A R Kme1 S T G G Kac A P R K Q    | ▶        | H3 1-19 | K9me1  | K14ac |       |      | free       |
| 68                  | C20              | A R T K Q T A R Kme2 pS T G G K A P R K Q     | ▶        | H3 1-19 | K9me2  | S10P  |       |      | free       |
| 69                  | C21              | A R T K Q T A R Kme2 S pT G G K A P R K Q     | ▶        | H3 1-19 | K9me2  | T11P  |       |      | free       |
| 70                  | C22              | A R T K Q T A R Kme2 S T G G Kac A P R K Q    | ▶        | H3 1-19 | K9me2  | K14ac |       |      | free       |
| 71                  | C23              | A R T K Q T A R Kme3 pS T G G K A P R K Q     | ▶        | H3 1-19 | K9me3  | S10P  |       |      | free       |
| 72                  | C24              | A R T K Q T A R Kme3 S pT G G K A P R K Q     | ▶        | H3 1-19 | K9me3  | T11P  |       |      | free       |
| 73                  | D 1              | A R T K Q T A R Kme3 S T G G Kac A P R K Q    | ▶        | H3 1-19 | K9me3  | K14ac |       |      | free       |
| 74                  | D 2              | A R T K Q T A R Kac pS T G G K A P R K Q      | ▶        | H3 1-19 | K9ac   | S10P  |       |      | free       |
| 75                  | D 3              | A R T K Q T A R Kac S pT G G K A P R K Q      | ▶        | H3 1-19 | K9ac   | T11P  |       |      | free       |
| 76                  | D 4              | A R T K Q T A R Kac S T G G Kac A P R K Q     | ▶        | H3 1-19 | K9ac   | K14ac |       |      | free       |
| 77                  | D 5              | A R T K Q T A R K pS pT G G K A P R K Q       | ▶        | H3 1-19 | S10P   | T11P  |       |      | free       |
| 78                  | D 6              | A R T K Q T A R K pS T G G Kac A P R K Q      | ▶        | H3 1-19 | S10P   | K14ac |       |      | free       |
| 79                  | D 7              | A R T K Q T A R K S pT G G Kac A P R K Q      | ▶        | H3 1-19 | T11P   | K14ac |       |      | free       |
| 80                  | D 8              | A R T K Q T A Rme2s Kme1 pS T G G K A P R K Q | ▶        | H3 1-19 | R8me2s | K9me1 | S10P  |      | free       |
| 81                  | D 9              | A R T K Q T A Rme2s Kme2 pS T G G K A P R K Q | ▶        | H3 1-19 | R8me2s | K9me2 | S10P  |      | free       |
| 82                  | D10              | A R T K Q T A Rme2s Kme3 pS T G G K A P R K Q | ▶        | H3 1-19 | R8me2s | K9me3 | S10P  |      | free       |
| 83                  | D11              | A R T K Q T A Rme2s Kac pS T G G K A P R K Q  | ▶        | H3 1-19 | R8me2s | K9ac  | S10P  |      | free       |
| 84                  | D12              | A R T K Q T A Rme2s Kme1 S pT G G K A P R K Q | ▶        | H3 1-19 | R8me2s | K9me1 | T11P  |      | free       |
| 85                  | D13              | A R T K Q T A Rme2s Kme2 S pT G G K A P R K Q | ▶        | H3 1-19 | R8me2s | K9me2 | T11P  |      | free       |
| 86                  | D14              | A R T K Q T A Rme2s Kme3 S pT G G K A P R K Q | ▶        | H3 1-19 | R8me2s | K9me3 | T11P  |      | free       |
| 87                  | D15              | A R T K Q T A Rme2s Kac S pT G G K A P R K Q  | ▶        | H3 1-19 | R8me2s | K9ac  | T11P  |      | free       |
| 88                  | D16              | A R T K Q T A Rme2a Kme1 pS T G G K A P R K Q | ▶        | H3 1-19 | R8me2a | K9me1 | S10P  |      | free       |
| 89                  | D17              | A R T K Q T A Rme2a Kme2 pS T G G K A P R K Q | ▶        | H3 1-19 | R8me2a | K9me2 | S10P  |      | free       |
| 90                  | D18              | A R T K Q T A Rme2a Kme3 pS T G G K A P R K Q | ▶        | H3 1-19 | R8me2a | K9me3 | S10P  |      | free       |
| 91                  | D19              | A R T K Q T A Rme2a Kac pS T G G K A P R K Q  | ▶        | H3 1-19 | R8me2a | K9ac  | S10P  |      | free       |
| 92                  | D20              | A R T K Q T A Rme2a Kme1 S pT G G K A P R K Q | ▶        | H3 1-19 | R8me2a | K9me1 | T11P  |      | free       |
| 93                  | D21              | A R T K Q T A Rme2a Kme2 S pT G G K A P R K Q | ▶        | H3 1-19 | R8me2a | K9me2 | T11P  |      | free       |
| 94                  | D22              | A R T K Q T A Rme2a Kme3 S pT G G K A P R K Q | ▶        | H3 1-19 | R8me2a | K9me3 | T11P  |      | free       |
| 95                  | D23              | A R T K Q T A Rme2a Kac S pT G G K A P R K Q  | ▶        | H3 1-19 | R8me2a | K9ac  | T11P  |      | free       |

**Active Motif**  
**Modified™ Histone Peptide Array\***  
**Catalog Nos. 13001 & 13005**

| Modification number | Peptide location | Peptide sequence                                    | to array | name    | Mod1   | Mod2   | Mod3   | Mod4  | N-terminus |
|---------------------|------------------|-----------------------------------------------------|----------|---------|--------|--------|--------|-------|------------|
| 96                  | D24              | A R T K Q T A Rme2a Kme1 pS pT G G K A P R K Q      | ▶        | H3 1-19 | R8me2a | K9me1  | S10P   | T11P  | free       |
| 97                  | E 1              | A R T K Q T A Rme2a Kme2 pS pT G G K A P R K Q      | ▶        | H3 1-19 | R8me2a | K9me2  | S10P   | T11P  | free       |
| 98                  | E 2              | A R T K Q T A Rme2a Kme3 pS pT G G K A P R K Q      | ▶        | H3 1-19 | R8me2a | K9me3  | S10P   | T11P  | free       |
| 99                  | E 3              | A R T K Q T A Rme2a Kac pS pT G G K A P R K Q       | ▶        | H3 1-19 | R8me2a | K9ac   | S10P   | T11P  | free       |
| 100                 | E 4              | A Rme2s T Kme1 Q T A Rme2s K S T G G K A P R K Q    | ▶        | H3 1-19 | R2me2s | K4me1  | R8me2s |       | free       |
| 101                 | E 5              | A Rme2s T Kme2 Q T A Rme2s K S T G G K A P R K Q    | ▶        | H3 1-19 | R2me2s | K4me2  | R8me2s |       | free       |
| 102                 | E 6              | A Rme2s T Kme3 Q T A Rme2s K S T G G K A P R K Q    | ▶        | H3 1-19 | R2me2s | K4me3  | R8me2s |       | free       |
| 103                 | E 7              | A Rme2s T Kac Q T A Rme2s K S T G G K A P R K Q     | ▶        | H3 1-19 | R2me2s | K4ac   | R8me2s |       | free       |
| 104                 | E 8              | A Rme2a T Kme1 Q T A Rme2a K S T G G K A P R K Q    | ▶        | H3 1-19 | R2me2a | K4me1  | R8me2a |       | free       |
| 105                 | E 9              | A Rme2a T Kme2 Q T A Rme2a K S T G G K A P R K Q    | ▶        | H3 1-19 | R2me2a | K4me2  | R8me2a |       | free       |
| 106                 | E10              | A Rme2a T Kme3 Q T A Rme2a K S T G G K A P R K Q    | ▶        | H3 1-19 | R2me2a | K4me3  | R8me2a |       | free       |
| 107                 | E11              | A Rme2a T Kac Q T A Rme2a K S T G G K A P R K Q     | ▶        | H3 1-19 | R2me2a | K4ac   | R8me2a |       | free       |
| 108                 | E12              | A Rme2s T Kme1 Q T A R Kme1 S T G G K A P R K Q     | ▶        | H3 1-19 | R2me2s | K4me1  | K9me1  |       | free       |
| 109                 | E13              | A Rme2s T Kme2 Q T A R Kme1 S T G G K A P R K Q     | ▶        | H3 1-19 | R2me2s | K4me2  | K9me1  |       | free       |
| 110                 | E14              | A Rme2s T Kme3 Q T A R Kme1 S T G G K A P R K Q     | ▶        | H3 1-19 | R2me2s | K4me3  | K9me1  |       | free       |
| 111                 | E15              | A Rme2s T Kac Q T A R Kme1 S T G G K A P R K Q      | ▶        | H3 1-19 | R2me2s | K4ac   | K9me1  |       | free       |
| 112                 | E16              | A Rme2a T Kme1 Q T A R Kme2 S T G G K A P R K Q     | ▶        | H3 1-19 | R2me2a | K4me1  | K9me2  |       | free       |
| 113                 | E17              | A Rme2a T Kme2 Q T A R Kme2 S T G G K A P R K Q     | ▶        | H3 1-19 | R2me2a | K4me2  | K9me2  |       | free       |
| 114                 | E18              | A Rme2a T Kme3 Q T A R Kme2 S T G G K A P R K Q     | ▶        | H3 1-19 | R2me2a | K4me3  | K9me2  |       | free       |
| 115                 | E19              | A Rme2a T Kac Q T A R Kme2 S T G G K A P R K Q      | ▶        | H3 1-19 | R2me2a | K4ac   | K9me2  |       | free       |
| 116                 | E20              | A Rme2s T Kme1 Q T A R Kme3 S T G G K A P R K Q     | ▶        | H3 1-19 | R2me2s | K4me1  | K9me3  |       | free       |
| 117                 | E21              | A Rme2s T Kme2 Q T A R Kme3 S T G G K A P R K Q     | ▶        | H3 1-19 | R2me2s | K4me2  | K9me3  |       | free       |
| 118                 | E22              | A Rme2s T Kme3 Q T A R Kme3 S T G G K A P R K Q     | ▶        | H3 1-19 | R2me2s | K4me3  | K9me3  |       | free       |
| 119                 | E23              | A Rme2s T Kac Q T A R Kme3 S T G G K A P R K Q      | ▶        | H3 1-19 | R2me2s | K4ac   | K9me3  |       | free       |
| 120                 | E24              | A Rme2a T Kme1 Q T A R Kac S T G G K A P R K Q      | ▶        | H3 1-19 | R2me2a | K4me1  | K9ac   |       | free       |
| 121                 | F 1              | A Rme2a T Kme2 Q T A R Kac S T G G K A P R K Q      | ▶        | H3 1-19 | R2me2a | K4me2  | K9ac   |       | free       |
| 122                 | F 2              | A Rme2a T Kme3 Q T A R Kac S T G G K A P R K Q      | ▶        | H3 1-19 | R2me2a | K4me3  | K9ac   |       | free       |
| 123                 | F 3              | A Rme2a T Kac Q T A R Kac S T G G K A P R K Q       | ▶        | H3 1-19 | R2me2a | K4ac   | K9ac   |       | free       |
| 124                 | F 4              | A R T Kme1 Q T A Rme2s Kme1 S T G G K A P R K Q     | ▶        | H3 1-19 | K4me1  | R8me2s | K9me1  |       | free       |
| 125                 | F 5              | A R T Kme2 Q T A Rme2s Kme1 S T G G K A P R K Q     | ▶        | H3 1-19 | K4me2  | R8me2s | K9me1  |       | free       |
| 126                 | F 6              | A R T Kme3 Q T A Rme2s Kme1 S T G G K A P R K Q     | ▶        | H3 1-19 | K4me3  | R8me2s | K9me1  |       | free       |
| 127                 | F 7              | A R T Kac Q T A Rme2s Kme1 S T G G K A P R K Q      | ▶        | H3 1-19 | K4ac   | R8me2s | K9me1  |       | free       |
| 128                 | F 8              | A R T Kme1 Q T A Rme2a Kme1 S T G G K A P R K Q     | ▶        | H3 1-19 | K4me1  | R8me2a | K9me1  |       | free       |
| 129                 | F 9              | A R T Kme2 Q T A Rme2a Kme1 S T G G K A P R K Q     | ▶        | H3 1-19 | K4me2  | R8me2a | K9me1  |       | free       |
| 130                 | F10              | A R T Kme3 Q T A Rme2a Kme1 S T G G K A P R K Q     | ▶        | H3 1-19 | K4me3  | R8me2a | K9me1  |       | free       |
| 131                 | F11              | A R T Kac Q T A Rme2a Kme1 S T G G K A P R K Q      | ▶        | H3 1-19 | K4ac   | R8me2a | K9me1  |       | free       |
| 132                 | F12              | A R T Kme1 Q T A Rme2s Kme2 S T G G K A P R K Q     | ▶        | H3 1-19 | K4me1  | R8me2s | K9me2  |       | free       |
| 133                 | F13              | A R T Kme2 Q T A Rme2s Kme2 S T G G K A P R K Q     | ▶        | H3 1-19 | K4me2  | R8me2s | K9me2  |       | free       |
| 134                 | F14              | A R T Kme3 Q T A Rme2s Kme2 S T G G K A P R K Q     | ▶        | H3 1-19 | K4me3  | R8me2s | K9me2  |       | free       |
| 135                 | F15              | A R T Kac Q T A Rme2s Kme2 S T G G K A P R K Q      | ▶        | H3 1-19 | K4ac   | R8me2s | K9me2  |       | free       |
| 136                 | F16              | A R T Kme1 Q T A Rme2a Kme2 S T G G K A P R K Q     | ▶        | H3 1-19 | K4me1  | R8me2a | K9me2  |       | free       |
| 137                 | F17              | A R T Kme2 Q T A Rme2a Kme2 S T G G K A P R K Q     | ▶        | H3 1-19 | K4me2  | R8me2a | K9me2  |       | free       |
| 138                 | F18              | A R T Kme3 Q T A Rme2a Kme2 S T G G K A P R K Q     | ▶        | H3 1-19 | K4me3  | R8me2a | K9me2  |       | free       |
| 139                 | F19              | A R T Kac Q T A Rme2a Kme2 S T G G K A P R K Q      | ▶        | H3 1-19 | K4ac   | R8me2a | K9me2  |       | free       |
| 140                 | F20              | A R T Kme1 Q T A Rme2s Kme3 S T G G K A P R K Q     | ▶        | H3 1-19 | K4me1  | R8me2s | K9me3  |       | free       |
| 141                 | F21              | A R T Kme2 Q T A Rme2s Kme3 S T G G K A P R K Q     | ▶        | H3 1-19 | K4me2  | R8me2s | K9me3  |       | free       |
| 142                 | F22              | A R T Kme3 Q T A Rme2s Kme3 S T G G K A P R K Q     | ▶        | H3 1-19 | K4me3  | R8me2s | K9me3  |       | free       |
| 143                 | F23              | A R T Kac Q T A Rme2s Kme3 S T G G K A P R K Q      | ▶        | H3 1-19 | K4ac   | R8me2s | K9me3  |       | free       |
| 144                 | F24              | A R T Kme1 Q T A Rme2a Kme3 S T G G K A P R K Q     | ▶        | H3 1-19 | K4me1  | R8me2a | K9me3  |       | free       |
| 145                 | G 1              | A R T Kme2 Q T A Rme2a Kme3 S T G G K A P R K Q     | ▶        | H3 1-19 | K4me2  | R8me2a | K9me3  |       | free       |
| 146                 | G 2              | A R T Kme3 Q T A Rme2a Kme3 S T G G K A P R K Q     | ▶        | H3 1-19 | K4me3  | R8me2a | K9me3  |       | free       |
| 147                 | G 3              | A R T Kac Q T A Rme2a Kme3 S T G G K A P R K Q      | ▶        | H3 1-19 | K4ac   | R8me2a | K9me3  |       | free       |
| 148                 | G 4              | A R T Kme1 Q T A Rme2s Kac S T G G K A P R K Q      | ▶        | H3 1-19 | K4me1  | R8me2s | K9ac   |       | free       |
| 149                 | G 5              | A R T Kme2 Q T A Rme2s Kac S T G G K A P R K Q      | ▶        | H3 1-19 | K4me2  | R8me2s | K9ac   |       | free       |
| 150                 | G 6              | A R T Kme3 Q T A Rme2s Kac S T G G K A P R K Q      | ▶        | H3 1-19 | K4me3  | R8me2s | K9ac   |       | free       |
| 151                 | G 7              | A R T Kac Q T A Rme2s Kac S T G G K A P R K Q       | ▶        | H3 1-19 | K4ac   | R8me2s | K9ac   |       | free       |
| 152                 | G 8              | A R T Kme1 Q T A Rme2a Kac S T G G K A P R K Q      | ▶        | H3 1-19 | K4me1  | R8me2a | K9ac   |       | free       |
| 153                 | G 9              | A R T Kme2 Q T A Rme2a Kac S T G G K A P R K Q      | ▶        | H3 1-19 | K4me2  | R8me2a | K9ac   |       | free       |
| 154                 | G10              | A R T Kme3 Q T A Rme2a Kac S T G G K A P R K Q      | ▶        | H3 1-19 | K4me3  | R8me2a | K9ac   |       | free       |
| 155                 | G11              | A R T Kac Q T A Rme2a Kac S T G G K A P R K Q       | ▶        | H3 1-19 | K4ac   | R8me2a | K9ac   |       | free       |
| 156                 | G12              | A Rme2s T Kme1 Q T A Rme2s Kme1 S T G G K A P R K Q | ▶        | H3 1-19 | R2me2s | K4me1  | R8me2s | K9me1 | free       |
| 157                 | G13              | A Rme2s T Kme2 Q T A Rme2s Kme1 S T G G K A P R K Q | ▶        | H3 1-19 | R2me2s | K4me2  | R8me2s | K9me1 | free       |
| 158                 | G14              | A Rme2s T Kme3 Q T A Rme2s Kme1 S T G G K A P R K Q | ▶        | H3 1-19 | R2me2s | K4me3  | R8me2s | K9me1 | free       |
| 159                 | G15              | A Rme2s T Kac Q T A Rme2s Kme1 S T G G K A P R K Q  | ▶        | H3 1-19 | R2me2s | K4ac   | R8me2s | K9me1 | free       |
| 160                 | G16              | A Rme2a T Kme1 Q T A Rme2s Kme1 S T G G K A P R K Q | ▶        | H3 1-19 | R2me2a | K4me1  | R8me2s | K9me1 | free       |
| 161                 | G17              | A Rme2a T Kme2 Q T A Rme2s Kme1 S T G G K A P R K Q | ▶        | H3 1-19 | R2me2a | K4me2  | R8me2s | K9me1 | free       |
| 162                 | G18              | A Rme2a T Kme3 Q T A Rme2s Kme1 S T G G K A P R K Q | ▶        | H3 1-19 | R2me2a | K4me3  | R8me2s | K9me1 | free       |
| 163                 | G19              | A Rme2a T Kac Q T A Rme2s Kme1 S T G G K A P R K Q  | ▶        | H3 1-19 | R2me2a | K4ac   | R8me2s | K9me1 | free       |
| 164                 | G20              | A Rme2s T Kme1 Q T A Rme2s Kme2 S T G G K A P R K Q | ▶        | H3 1-19 | R2me2s | K4me1  | R8me2s | K9me2 | free       |
| 165                 | G21              | A Rme2s T Kme2 Q T A Rme2s Kme2 S T G G K A P R K Q | ▶        | H3 1-19 | R2me2s | K4me2  | R8me2s | K9me2 | free       |
| 166                 | G22              | A Rme2s T Kme3 Q T A Rme2s Kme2 S T G G K A P R K Q | ▶        | H3 1-19 | R2me2s | K4me3  | R8me2s | K9me2 | free       |
| 167                 | G23              | A Rme2s T Kac Q T A Rme2s Kme2 S T G G K A P R K Q  | ▶        | H3 1-19 | R2me2s | K4ac   | R8me2s | K9me2 | free       |
| 168                 | G24              | A Rme2a T Kme1 Q T A Rme2s Kme2 S T G G K A P R K Q | ▶        | H3 1-19 | R2me2a | K4me1  | R8me2s | K9me2 | free       |
| 169                 | H 1              | A Rme2a T Kme2 Q T A Rme2s Kme2 S T G G K A P R K Q | ▶        | H3 1-19 | R2me2a | K4me2  | R8me2s | K9me2 | free       |
| 170                 | H 2              | A Rme2a T Kme3 Q T A Rme2s Kme2 S T G G K A P R K Q | ▶        | H3 1-19 | R2me2a | K4me3  | R8me2s | K9me2 | free       |
| 171                 | H 3              | A Rme2a T Kac Q T A Rme2s Kme2 S T G G K A P R K Q  | ▶        | H3 1-19 | R2me2a | K4ac   | R8me2s | K9me2 | free       |
| 172                 | H 4              | A Rme2s T Kme1 Q T A Rme2s Kme3 S T G G K A P R K Q | ▶        | H3 1-19 | R2me2s | K4me1  | R8me2s | K9me3 | free       |
| 173                 | H 5              | A Rme2s T Kme2 Q T A Rme2s Kme3 S T G G K A P R K Q | ▶        | H3 1-19 | R2me2s | K4me2  | R8me2s | K9me3 | free       |
| 174                 | H 6              | A Rme2s T Kme3 Q T A Rme2s Kme3 S T G G K A P R K Q | ▶        | H3 1-19 | R2me2s | K4me3  | R8me2s | K9me3 | free       |
| 175                 | H 7              | A Rme2s T Kac Q T A Rme2s Kme3 S T G G K A P R K Q  | ▶        | H3 1-19 | R2me2s | K4ac   | R8me2s | K9me3 | free       |
| 176                 | H 8              | A Rme2a T Kme1 Q T A Rme2s Kme3 S T G G K A P R K Q | ▶        | H3 1-19 | R2me2a | K4me1  | R8me2s | K9me3 | free       |
| 177                 | H 9              | A Rme2a T Kme2 Q T A Rme2s Kme3 S T G G K A P R K Q | ▶        | H3 1-19 | R2me2a | K4me2  | R8me2s | K9me3 | free       |
| 178                 | H10              | A Rme2a T Kme3 Q T A Rme2s Kme3 S T G G K A P R K Q | ▶        | H3 1-19 | R2me2a | K4me3  | R8me2s | K9me3 | free       |
| 179                 | H11              | A Rme2a T Kac Q T A Rme2s Kme3 S T G G K A P R K Q  | ▶        | H3 1-19 | R2me2a | K4ac   | R8me2s | K9me3 | free       |
| 180                 | H12              | A Rme2s T Kme1 Q T A Rme2s Kac S T G G K A P R K Q  | ▶        | H3 1-19 | R2me2s | K4me1  | R8me2s | K9ac  | free       |
| 181                 | H13              | A Rme2s T Kme2 Q T A Rme2s Kac S T G G K A P R K Q  | ▶        | H3 1-19 | R2me2s | K4me2  | R8me2s | K9ac  | free       |
| 182                 | H14              | A Rme2s T Kme3 Q T A Rme2s Kac S T G G K A P R K Q  | ▶        | H3 1-19 | R2me2s | K4me3  | R8me2s | K9ac  | free       |
| 183                 | H15              | A Rme2s T Kac Q T A Rme2s Kac S T G G K A P R K Q   | ▶        | H3 1-19 | R2me2s | K4ac   | R8me2s | K9ac  | free       |
| 184                 | H16              | A Rme2a T Kme1 Q T A Rme2s Kac S T G G K A P R K Q  | ▶        | H3 1-19 | R2me2a | K4me1  | R8me2s | K9ac  | free       |
| 185                 | H17              | A Rme2a T Kme2 Q T A Rme2s Kac S T G G K A P R K Q  | ▶        | H3 1-19 | R2me2a | K4me2  | R8me2s | K9ac  | free       |
| 186                 | H18              | A Rme2a T Kme3 Q T A Rme2s Kac S T G G K A P R K Q  | ▶        | H3 1-19 | R2me2a | K4me3  | R8me2s | K9ac  | free       |
| 187                 | H19              | A Rme2a T Kac Q T A Rme2s Kac S T G G K A P R K Q   | ▶        | H3 1-19 | R2me2a | K4ac   | R8me2s | K9ac  | free       |
| 188                 | H20              | A Rme2s T Kme1 Q T A Rme2a Kme1 S T G G K A P R K Q | ▶        | H3 1-19 | R2me2s | K4me1  | R8me2a | K9me1 | free       |
| 189                 | H21              | A Rme2s T Kme2 Q T A Rme2a Kme1 S T G G K A P R K Q | ▶        | H3 1-19 | R2me2s | K4me2  | R8me2a | K9me1 | free       |
| 190                 | H22              | A Rme2s T Kme3 Q T A Rme2a Kme1 S T G G K A P R K Q | ▶        | H3 1-19 | R2me2s | K4me3  | R8me2a | K9me1 | free       |

**Active Motif**  
**Modified™ Histone Peptide Array\***  
**Catalog Nos. 13001 & 13005**

| <b>Modification number</b> | <b>Peptide location</b> | <b>Peptide sequence</b>                             | <b>to array</b> | <b>name</b> | <b>Mod1</b> | <b>Mod2</b> | <b>Mod3</b> | <b>Mod4</b> | <b>N-terminus</b> |
|----------------------------|-------------------------|-----------------------------------------------------|-----------------|-------------|-------------|-------------|-------------|-------------|-------------------|
| 191                        | H23                     | A Rme2s T Kac Q T A Rme2a Kme1 S T G G K A P R K Q  | ▶               | H3 1-19     | R2me2s      | K4ac        | R8me2a      | K9me1       | free              |
| 192                        | H24                     | A Rme2a T Kme1 Q T A Rme2a Kme1 S T G G K A P R K Q | ▶               | H3 1-19     | R2me2a      | K4me1       | R8me2a      | K9me1       | free              |
| 193                        | I 1                     | A Rme2a T Kme2 Q T A Rme2a Kme1 S T G G K A P R K Q | ▶               | H3 1-19     | R2me2a      | K4me2       | R8me2a      | K9me1       | free              |
| 194                        | I 2                     | A Rme2a T Kme3 Q T A Rme2a Kme1 S T G G K A P R K Q | ▶               | H3 1-19     | R2me2a      | K4me3       | R8me2a      | K9me1       | free              |
| 195                        | I 3                     | A Rme2a T Kac Q T A Rme2a Kme1 S T G G K A P R K Q  | ▶               | H3 1-19     | R2me2a      | K4ac        | R8me2a      | K9me1       | free              |
| 196                        | I 4                     | A Rme2s T Kme1 Q T A Rme2a Kme2 S T G G K A P R K Q | ▶               | H3 1-19     | R2me2s      | K4me1       | R8me2a      | K9me2       | free              |
| 197                        | I 5                     | A Rme2s T Kme2 Q T A Rme2a Kme2 S T G G K A P R K Q | ▶               | H3 1-19     | R2me2s      | K4me2       | R8me2a      | K9me2       | free              |
| 198                        | I 6                     | A Rme2s T Kme3 Q T A Rme2a Kme2 S T G G K A P R K Q | ▶               | H3 1-19     | R2me2s      | K4me3       | R8me2a      | K9me2       | free              |
| 199                        | I 7                     | A Rme2s T Kac Q T A Rme2a Kme2 S T G G K A P R K Q  | ▶               | H3 1-19     | R2me2s      | K4ac        | R8me2a      | K9me2       | free              |
| 200                        | I 8                     | A Rme2a T Kme1 Q T A Rme2a Kme2 S T G G K A P R K Q | ▶               | H3 1-19     | R2me2a      | K4me1       | R8me2a      | K9me2       | free              |
| 201                        | I 9                     | A Rme2a T Kme2 Q T A Rme2a Kme2 S T G G K A P R K Q | ▶               | H3 1-19     | R2me2a      | K4me2       | R8me2a      | K9me2       | free              |
| 202                        | I10                     | A Rme2a T Kme3 Q T A Rme2a Kme2 S T G G K A P R K Q | ▶               | H3 1-19     | R2me2a      | K4me3       | R8me2a      | K9me2       | free              |
| 203                        | I11                     | A Rme2a T Kac Q T A Rme2a Kme2 S T G G K A P R K Q  | ▶               | H3 1-19     | R2me2a      | K4ac        | R8me2a      | K9me2       | free              |
| 204                        | I12                     | A Rme2s T Kme1 Q T A Rme2a Kme3 S T G G K A P R K Q | ▶               | H3 1-19     | R2me2s      | K4me1       | R8me2a      | K9me3       | free              |
| 205                        | I13                     | A Rme2s T Kme2 Q T A Rme2a Kme3 S T G G K A P R K Q | ▶               | H3 1-19     | R2me2s      | K4me2       | R8me2a      | K9me3       | free              |
| 206                        | I14                     | A Rme2s T Kme3 Q T A Rme2a Kme3 S T G G K A P R K Q | ▶               | H3 1-19     | R2me2s      | K4me3       | R8me2a      | K9me3       | free              |
| 207                        | I15                     | A Rme2s T Kac Q T A Rme2a Kme3 S T G G K A P R K Q  | ▶               | H3 1-19     | R2me2s      | K4ac        | R8me2a      | K9me3       | free              |
| 208                        | I16                     | A Rme2a T Kme1 Q T A Rme2a Kme3 S T G G K A P R K Q | ▶               | H3 1-19     | R2me2a      | K4me1       | R8me2a      | K9me3       | free              |
| 209                        | I17                     | A Rme2a T Kme2 Q T A Rme2a Kme3 S T G G K A P R K Q | ▶               | H3 1-19     | R2me2a      | K4me2       | R8me2a      | K9me3       | free              |
| 210                        | I18                     | A Rme2a T Kme3 Q T A Rme2a Kme3 S T G G K A P R K Q | ▶               | H3 1-19     | R2me2a      | K4me3       | R8me2a      | K9me3       | free              |
| 211                        | I19                     | A Rme2a T Kac Q T A Rme2a Kme3 S T G G K A P R K Q  | ▶               | H3 1-19     | R2me2a      | K4ac        | R8me2a      | K9me3       | free              |
| 212                        | I20                     | A Rme2s T Kme1 Q T A Rme2a Kac S T G G K A P R K Q  | ▶               | H3 1-19     | R2me2s      | K4me1       | R8me2a      | K9ac        | free              |
| 213                        | I21                     | A Rme2s T Kme2 Q T A Rme2a Kac S T G G K A P R K Q  | ▶               | H3 1-19     | R2me2s      | K4me2       | R8me2a      | K9ac        | free              |
| 214                        | I22                     | A Rme2s T Kme3 Q T A Rme2a Kac S T G G K A P R K Q  | ▶               | H3 1-19     | R2me2s      | K4me3       | R8me2a      | K9ac        | free              |
| 215                        | I23                     | A Rme2s T Kac Q T A Rme2a Kac S T G G K A P R K Q   | ▶               | H3 1-19     | R2me2s      | K4ac        | R8me2a      | K9ac        | free              |
| 216                        | I24                     | A Rme2a T Kme1 Q T A Rme2a Kac S T G G K A P R K Q  | ▶               | H3 1-19     | R2me2a      | K4me1       | R8me2a      | K9ac        | free              |
| 217                        | J 1                     | A Rme2a T Kme2 Q T A Rme2a Kac S T G G K A P R K Q  | ▶               | H3 1-19     | R2me2a      | K4me2       | R8me2a      | K9ac        | free              |
| 218                        | J 2                     | A Rme2a T Kme3 Q T A Rme2a Kac S T G G K A P R K Q  | ▶               | H3 1-19     | R2me2a      | K4me3       | R8me2a      | K9ac        | free              |
| 219                        | J 3                     | A Rme2a T Kac Q T A Rme2a Kac S T G G K A P R K Q   | ▶               | H3 1-19     | R2me2a      | K4ac        | R8me2a      | K9ac        | free              |
| 220                        | J 4                     | A R K S T G G K A P R K Q L A T K A A R             | ▶               | H3 7-26     | unmod       |             |             |             | acetylated        |
| 221                        | J 5                     | A R K S T G G K A C A P R K Q L A T K A A R         | ▶               | H3 7-26     | K14ac       |             |             |             | acetylated        |
| 222                        | J 6                     | A R K pS T G G K A C A P R K Q L A T K A A R        | ▶               | H3 7-26     | K14ac       | S10P        |             |             | acetylated        |
| 223                        | J 7                     | A R K S pT G G K A C A P R K Q L A T K A A R        | ▶               | H3 7-26     | K14ac       | T11P        |             |             | acetylated        |
| 224                        | J 8                     | A R K S T G G K A P Rme2s K Q L A T K A A R         | ▶               | H3 7-26     | R17me2s     |             |             |             | acetylated        |
| 225                        | J 9                     | A R K S T G G K A P Rme2a K Q L A T K A A R         | ▶               | H3 7-26     | R17me2a     |             |             |             | acetylated        |
| 226                        | J10                     | A R K S T G G K A P Cit K Q L A T K A A R           | ▶               | H3 7-26     | R17Citr     |             |             |             | acetylated        |
| 227                        | J11                     | A R K S T G G K A P R Kac Q L A T K A A R           | ▶               | H3 7-26     | K18ac       |             |             |             | acetylated        |
| 228                        | J12                     | A R K S T G G Kac A P Rme2s K Q L A T K A A R       | ▶               | H3 7-26     | K14ac       | R17me2s     |             |             | acetylated        |
| 229                        | J13                     | A R K S T G G Kac A P Rme2a K Q L A T K A A R       | ▶               | H3 7-26     | K14ac       | R17me2a     |             |             | acetylated        |
| 230                        | J14                     | A R K S T G G Kac A P R Kac Q L A T K A A R         | ▶               | H3 7-26     | K14ac       | K18ac       |             |             | acetylated        |
| 231                        | J15                     | A R K S T G G K A P Rme2s Kac Q L A T K A A R       | ▶               | H3 7-26     | R17me2s     | K18ac       |             |             | acetylated        |
| 232                        | J16                     | A R K S T G G K A P Rme2a Kac Q L A T K A A R       | ▶               | H3 7-26     | R17me2a     | K18ac       |             |             | acetylated        |
| 233                        | J17                     | A R K S T G G K A P Cit Kac Q L A T K A A R         | ▶               | H3 7-26     | R17Citr     | K18ac       |             |             | acetylated        |
| 234                        | J18                     | A R K S T G G Kac A P Rme2s Kac Q L A T K A A R     | ▶               | H3 7-26     | K14ac       | R17me2s     | K18ac       |             | acetylated        |
| 235                        | J19                     | A R K S T G G Kac A P Rme2a Kac Q L A T K A A R     | ▶               | H3 7-26     | K14ac       | R17me2a     | K18ac       |             | acetylated        |
| 236                        | J20                     | P R K Q L A T K A A R K S A P A T G G               | ▶               | H3 16-35    | unmod       |             |             |             | acetylated        |
| 237                        | J21                     | P R K Q L A T K A A Rme2s K S A P A T G G           | ▶               | H3 16-35    | R26me2s     |             |             |             | acetylated        |
| 238                        | J22                     | P R K Q L A T K A A Rme2a K S A P A T G G           | ▶               | H3 16-35    | R26me2a     |             |             |             | acetylated        |
| 239                        | J23                     | P R K Q L A T K A A Cit K S A P A T G G             | ▶               | H3 16-35    | R26Citr     |             |             |             | acetylated        |
| 240                        | J24                     | P R K Q L A T K A A R Kme1 S A P A T G G            | ▶               | H3 16-35    | K27me1      |             |             |             | acetylated        |
| 241                        | K 1                     | P R K Q L A T K A A R Kme2 S A P A T G G            | ▶               | H3 16-35    | K27me2      |             |             |             | acetylated        |
| 242                        | K 2                     | P R K Q L A T K A A R Kme3 S A P A T G G            | ▶               | H3 16-35    | K27me3      |             |             |             | acetylated        |
| 243                        | K 3                     | P R K Q L A T K A A R Kac S A P A T G G             | ▶               | H3 16-35    | K27ac       |             |             |             | acetylated        |
| 244                        | K 4                     | P R K Q L A T K A A R K pS A P A T G G              | ▶               | H3 16-35    | S28P        |             |             |             | acetylated        |
| 245                        | K 5                     | P R K Q L A T K A A R Kme1 S A P A T G G            | ▶               | H3 16-35    | R26me2s     | K27me1      |             |             | acetylated        |
| 246                        | K 6                     | P R K Q L A T K A A Rme2s Kme2 S A P A T G G        | ▶               | H3 16-35    | R26me2s     | K27me2      |             |             | acetylated        |
| 247                        | K 7                     | P R K Q L A T K A A Rme2s Kme3 S A P A T G G        | ▶               | H3 16-35    | R26me2s     | K27me3      |             |             | acetylated        |
| 248                        | K 8                     | P R K Q L A T K A A Rme2s Kac S A P A T G G         | ▶               | H3 16-35    | R26me2s     | K27ac       |             |             | acetylated        |
| 249                        | K 9                     | P R K Q L A T K A A Rme2s K pS A P A T G G          | ▶               | H3 16-35    | R26me2s     | S28P        |             |             | acetylated        |
| 250                        | K10                     | P R K Q L A T K A A Rme2a Kme1 S A P A T G G        | ▶               | H3 16-35    | R26me2a     | K27me1      |             |             | acetylated        |
| 251                        | K11                     | P R K Q L A T K A A Rme2a Kme2 S A P A T G G        | ▶               | H3 16-35    | R26me2a     | K27me2      |             |             | acetylated        |
| 252                        | K12                     | P R K Q L A T K A A Rme2a Kme3 S A P A T G G        | ▶               | H3 16-35    | R26me2a     | K27me3      |             |             | acetylated        |
| 253                        | K13                     | P R K Q L A T K A A Rme2a Kac S A P A T G G         | ▶               | H3 16-35    | R26me2a     | K27ac       |             |             | acetylated        |
| 254                        | K14                     | P R K Q L A T K A A Rme2a K pS A P A T G G          | ▶               | H3 16-35    | R26me2a     | S28P        |             |             | acetylated        |
| 255                        | K15                     | P R K Q L A T K A A Cit Kme1 S A P A T G G          | ▶               | H3 16-35    | R26Citr     | K27me1      |             |             | acetylated        |
| 256                        | K16                     | P R K Q L A T K A A Cit Kme2 S A P A T G G          | ▶               | H3 16-35    | R26Citr     | K27me2      |             |             | acetylated        |
| 257                        | K17                     | P R K Q L A T K A A Cit Kme3 S A P A T G G          | ▶               | H3 16-35    | R26Citr     | K27me3      |             |             | acetylated        |
| 258                        | K18                     | P R K Q L A T K A A Cit K pS A P A T G G            | ▶               | H3 16-35    | R26Citr     | S28P        |             |             | acetylated        |
| 259                        | K19                     | P R K Q L A T K A A R Kme1 pS A P A T G G           | ▶               | H3 16-35    | K27me1      | S28P        |             |             | acetylated        |
| 260                        | K20                     | P R K Q L A T K A A R Kme2 pS A P A T G G           | ▶               | H3 16-35    | K27me2      | S28P        |             |             | acetylated        |
| 261                        | K21                     | P R K Q L A T K A A R Kme3 pS A P A T G G           | ▶               | H3 16-35    | K27me3      | S28P        |             |             | acetylated        |
| 262                        | K22                     | P R K Q L A T K A A R Kac pS A P A T G G            | ▶               | H3 16-35    | K27ac       | S28P        |             |             | acetylated        |
| 263                        | K23                     | P R K Q L A T K A A Rme2s Kme1 pS A P A T G G       | ▶               | H3 16-35    | R26me2s     | K27me1      | S28P        |             | acetylated        |
| 264                        | K24                     | P R K Q L A T K A A Rme2s Kme2 pS A P A T G G       | ▶               | H3 16-35    | R26me2s     | K27me2      | S28P        |             | acetylated        |
| 265                        | L 1                     | P R K Q L A T K A A Rme2s Kme3 pS A P A T G G       | ▶               | H3 16-35    | R26me2s     | K27me3      | S28P        |             | acetylated        |
| 266                        | L 2                     | P R K Q L A T K A A Rme2s Kac pS A P A T G G        | ▶               | H3 16-35    | R26me2s     | K27ac       | S28P        |             | acetylated        |
| 267                        | L 3                     | P R K Q L A T K A A Rme2a Kme1 pS A P A T G G       | ▶               | H3 16-35    | R26me2a     | K27me1      | S28P        |             | acetylated        |
| 268                        | L 4                     | P R K Q L A T K A A Rme2a Kme2 pS A P A T G G       | ▶               | H3 16-35    | R26me2a     | K27me2      | S28P        |             | acetylated        |
| 269                        | L 5                     | P R K Q L A T K A A Rme2a Kme3 pS A P A T G G       | ▶               | H3 16-35    | R26me2a     | K27me3      | S28P        |             | acetylated        |
| 270                        | L 6                     | P R K Q L A T K A A Rme2a Kac pS A P A T G G        | ▶               | H3 16-35    | R26me2a     | K27ac       | S28P        |             | acetylated        |
| 271                        | L 7                     | R K S A P A T G G V K K P H R Y R P G               | ▶               | H3 26-45    | unmod       |             |             |             | acetylated        |
| 272                        | L 8                     | R K S A P A T G G V Kme1 K P H R Y R P G            | ▶               | H3 26-45    | K36me1      |             |             |             | acetylated        |
| 273                        | L 9                     | R K S A P A T G G V Kme2 K P H R Y R P G            | ▶               | H3 26-45    | K36me2      |             |             |             | acetylated        |
| 274                        | L10                     | R K S A P A T G G V Kme3 K P H R Y R P G            | ▶               | H3 26-45    | K36me3      |             |             |             | acetylated        |
| 275                        | L11                     | R K S A P A T G G V Kac K P H R Y R P G             | ▶               | H3 26-45    | K36ac       |             |             |             | acetylated        |
| 276                        | L12                     | S G R G K G G K G L G K G G A K R H R               | ▶               | H4 1-19     | unmod       |             |             |             | free              |
| 277                        | L13                     | pS G R G K G G K G L G K G G A K R H R              | ▶               | H4 1-19     | S1P         |             |             |             | free              |
| 278                        | L14                     | S G Rme2s G K G G K G L G K G G A K R H R           | ▶               | H4 1-19     | R3me2s      |             |             |             | free              |
| 279                        | L15                     | S G Rme2a G K G G K G L G K G G A K R H R           | ▶               | H4 1-19     | R3me2a      |             |             |             | free              |
| 280                        | L16                     | S G R G Kac G K G K G L G K G G A K R H R           | ▶               | H4 1-19     | K5ac        |             |             |             | free              |
| 281                        | L17                     | S G R G K G G K Gac G L G K G G A K R H R           | ▶               | H4 1-19     | K8ac        |             |             |             | free              |
| 282                        | L18                     | S G R G K G G K G L G Kac G G A K R H R             | ▶               | H4 1-19     | K12ac       |             |             |             | free              |
| 283                        | L19                     | S G R G K G G K G L G K G G A Kac R H R             | ▶               | H4 1-19     | K16ac       |             |             |             | free              |
| 284                        | L20                     | pS G Rme2s G K G G K G L G K G G A K R H R          | ▶               | H4 1-19     | S1P         | R3me2s      |             |             | free              |
| 285                        | L21                     | pS G Rme2a G K G G K G L G K G G A K R H R          | ▶               | H4 1-19     | S1P         | R3me2a      |             |             | free              |

**Active Motif**  
**Modified™ Histone Peptide Array\***  
**Catalog Nos. 13001 & 13005**

| Modification number | Peptide location | Peptide sequence                                | to array | name                    | Mod1    | Mod2    | Mod3   | Mod4  | N-terminus   |
|---------------------|------------------|-------------------------------------------------|----------|-------------------------|---------|---------|--------|-------|--------------|
| 286                 | L22              | pS G R G Kac G G K G L G K G G A K R H R        | ▶        | H4 1-19                 | S1P     | K5ac    |        |       | free         |
| 287                 | L23              | S G Rme2s G Kac G G K G L G K G G A K R H R     | ▶        | H4 1-19                 | R3me2s  | K5ac    |        |       | free         |
| 288                 | L24              | S G Rme2s G K G G Kac G L G K G G A K R H R     | ▶        | H4 1-19                 | R3me2s  | K8ac    |        |       | free         |
| 289                 | M 1              | S G Rme2a G Kac G G K G L G K G G A K R H R     | ▶        | H4 1-19                 | R3me2a  | K5ac    |        |       | free         |
| 290                 | M 2              | S G Rme2a G K G G Kac G L G K G G A K R H R     | ▶        | H4 1-19                 | R3me2a  | K8ac    |        |       | free         |
| 291                 | M 3              | S G R G Kac G G Kac G L G K G G A K R H R       | ▶        | H4 1-19                 | K5ac    | K8ac    |        |       | free         |
| 292                 | M 4              | S G R G K G G Kac G L G Kac G G A K R H R       | ▶        | H4 1-19                 | K8ac    | K12ac   |        |       | free         |
| 293                 | M 5              | S G R G K G G Kac G L G K G G A Kac R H R       | ▶        | H4 1-19                 | K8ac    | K16ac   |        |       | free         |
| 294                 | M 6              | S G R G K G G K G L G Kac G G A Kac R H R       | ▶        | H4 1-19                 | K12ac   | K16ac   |        |       | free         |
| 295                 | M 7              | pS G Rme2s G Kac G G K G L G K G G A K R H R    | ▶        | H4 1-19                 | S1P     | R3me2s  | K5ac   |       | free         |
| 296                 | M 8              | pS G Rme2a G Kac G G K G L G K G G A K R H R    | ▶        | H4 1-19                 | S1P     | R3me2a  | K5ac   |       | free         |
| 297                 | M 9              | S G Rme2s G Kac G G Kac G L G K G G A K R H R   | ▶        | H4 1-19                 | R3me2s  | K5ac    | K8ac   |       | free         |
| 298                 | M10              | S G Rme2a G Kac G G Kac G L G K G G A K R H R   | ▶        | H4 1-19                 | R3me2a  | K5ac    | K8ac   |       | free         |
| 299                 | M11              | S G R G Kac G G Kac G L G Kac G G A K R H R     | ▶        | H4 1-19                 | K5ac    | K8ac    | K12ac  |       | free         |
| 300                 | M12              | S G R G K G G Kac G L G Kac G G A Kac R H R     | ▶        | H4 1-19                 | K8ac    | K12ac   | K16ac  |       | free         |
| 301                 | M13              | pS G Rme2s G Kac G G Kac G L G K G G A K R H R  | ▶        | H4 1-19                 | S1P     | R3me2s  | K5ac   | K8ac  | free         |
| 302                 | M14              | pS G Rme2a G Kac G G Kac G L G K G G A K R H R  | ▶        | H4 1-19                 | S1P     | R3me2a  | K5ac   | K8ac  | free         |
| 303                 | M15              | S G Rme2s G Kac G G Kac G L G Kac G G A K R H R | ▶        | H4 1-19                 | R3me2s  | K5ac    | K8ac   | K12ac | free         |
| 304                 | M16              | S G Rme2a G Kac G G Kac G L G Kac G G A K R H R | ▶        | H4 1-19                 | R3me2a  | K5ac    | K8ac   | K12ac | free         |
| 305                 | M17              | S G R G Kac G G Kac G L G Kac G G A Kac R H R   | ▶        | H4 1-19                 | K5ac    | K8ac    | K12ac  | K16ac | free         |
| 306                 | M18              | G K G G A K R H R K V L R D N I Q G I T         | ▶        | H4 11-30                | unmod   |         |        |       | acetylated   |
| 307                 | M19              | G Kac G G A K R H R K V L R D N I Q G I T       | ▶        | H4 11-30                | K12ac   |         |        |       | acetylated   |
| 308                 | M20              | G K G G A Kac R H R K V L R D N I Q G I T       | ▶        | H4 11-30                | K16ac   |         |        |       | acetylated   |
| 309                 | M21              | G K G G A K Rme2s H R K V L R D N I Q G I T     | ▶        | H4 11-30                | R17me2s |         |        |       | acetylated   |
| 310                 | M22              | G K G G A K Rme2a H R K V L R D N I Q G I T     | ▶        | H4 11-30                | R17me2a |         |        |       | acetylated   |
| 311                 | M23              | G K G G A K R H Rme2s K V L R D N I Q G I T     | ▶        | H4 11-30                | R19me2s |         |        |       | acetylated   |
| 312                 | M24              | G K G G A K R H Rme2a K V L R D N I Q G I T     | ▶        | H4 11-30                | R19me2a |         |        |       | acetylated   |
| 313                 | N 1              | G K G G A K R H R Kme1 V L R D N I Q G I T      | ▶        | H4 11-30                | K20me1  |         |        |       | acetylated   |
| 314                 | N 2              | G K G G A K R H R Kme2 V L R D N I Q G I T      | ▶        | H4 11-30                | K20me2  |         |        |       | acetylated   |
| 315                 | N 3              | G K G G A K R H R Kme3 V L R D N I Q G I T      | ▶        | H4 11-30                | K20me3  |         |        |       | acetylated   |
| 316                 | N 4              | G K G G A K R H R Kac V L R D N I Q G I T       | ▶        | H4 11-30                | K20ac   |         |        |       | acetylated   |
| 317                 | N 5              | G K G G A K R H R K V L Rme2a D N I Q G I T     | ▶        | H4 11-30                | R24me2a |         |        |       | acetylated   |
| 318                 | N 6              | G K G G A K R H R K V L Rme2s D N I Q G I T     | ▶        | H4 11-30                | R24me2s |         |        |       | acetylated   |
| 319                 | N 7              | G Kac G G A Kac R H R K V L R D N I Q G I T     | ▶        | H4 11-30                | K12ac   | K16ac   |        |       | acetylated   |
| 320                 | N 8              | G K G G A Kac Rme2s H R K V L R D N I Q G I T   | ▶        | H4 11-30                | K16ac   | R17me2s |        |       | acetylated   |
| 321                 | N 9              | G K G G A Kac Rme2a H R K V L R D N I Q G I T   | ▶        | H4 11-30                | K16ac   | R17me2a |        |       | acetylated   |
| 322                 | N10              | G K G G A Kac R H Rme2s K V L R D N I Q G I T   | ▶        | H4 11-30                | K16ac   | R19me2s |        |       | acetylated   |
| 323                 | N11              | G K G G A Kac R H Rme2a K V L R D N I Q G I T   | ▶        | H4 11-30                | K16ac   | R19me2a |        |       | acetylated   |
| 324                 | N12              | G K G G A Kac R H R Kme1 V L R D N I Q G I T    | ▶        | H4 11-30                | K16ac   | K20me1  |        |       | acetylated   |
| 325                 | N13              | G K G G A Kac R H R Kme2 V L R D N I Q G I T    | ▶        | H4 11-30                | K16ac   | K20me2  |        |       | acetylated   |
| 326                 | N14              | G K G G A Kac R H R Kme3 V L R D N I Q G I T    | ▶        | H4 11-30                | K16ac   | K20me3  |        |       | acetylated   |
| 327                 | N15              | G K G G A Kac R H R Kac V L R D N I Q G I T     | ▶        | H4 11-30                | K16ac   | K20ac   |        |       | acetylated   |
| 328                 | N16              | G Kac G G A Kac R H R Kme1 V L R D N I Q G I T  | ▶        | H4 11-30                | K12ac   | K16ac   | K20me1 |       | acetylated   |
| 329                 | N17              | G Kac G G A Kac R H R Kme2 V L R D N I Q G I T  | ▶        | H4 11-30                | K12ac   | K16ac   | K20me2 |       | acetylated   |
| 330                 | N18              | G Kac G G A Kac R H R Kme3 V L R D N I Q G I T  | ▶        | H4 11-30                | K12ac   | K16ac   | K20me3 |       | acetylated   |
| 331                 | N19              | G Kac G G A Kac R H R Kac V L R D N I Q G I T   | ▶        | H4 11-30                | K12ac   | K16ac   | K20ac  |       | acetylated   |
| 332                 | N20              | G K G G A K R H Rme2a Kme1 V L R D N I Q G I T  | ▶        | H4 11-30                | R19me2a | K20me1  |        |       | acetylated   |
| 333                 | N21              | G K G G A K R H Rme2a Kme2 V L R D N I Q G I T  | ▶        | H4 11-30                | R19me2a | K20me2  |        |       | acetylated   |
| 334                 | N22              | G K G G A K R H Rme2a Kme3 V L R D N I Q G I T  | ▶        | H4 11-30                | R19me2a | K20me3  |        |       | acetylated   |
| 335                 | N23              | G K G G A K R H Rme2a Kac V L R D N I Q G I T   | ▶        | H4 11-30                | R19me2a | K20ac   |        |       | acetylated   |
| 336                 | N24              | G K G G A K R H Rme2s Kme1 V L R D N I Q G I T  | ▶        | H4 11-30                | R19me2s | K20me1  |        |       | acetylated   |
| 337                 | O 1              | G K G G A K R H Rme2s Kme2 V L R D N I Q G I T  | ▶        | H4 11-30                | R19me2s | K20me2  |        |       | acetylated   |
| 338                 | O 2              | G K G G A K R H Rme2s Kme3 V L R D N I Q G I T  | ▶        | H4 11-30                | R19me2s | K20me3  |        |       | acetylated   |
| 339                 | O 3              | G K G G A K R H Rme2s Kac V L R D N I Q G I T   | ▶        | H4 11-30                | R19me2s | K20ac   |        |       | acetylated   |
| 340                 | O 4              | G K G G A K R H R Kme1 V L Rme2a D N I Q G I T  | ▶        | H4 11-30                | R24me2a | K20me1  |        |       | acetylated   |
| 341                 | O 5              | G K G G A K R H R Kme2 V L Rme2a D N I Q G I T  | ▶        | H4 11-30                | R24me2a | K20me2  |        |       | acetylated   |
| 342                 | O 6              | G K G G A K R H R Kme3 V L Rme2a D N I Q G I T  | ▶        | H4 11-30                | R24me2a | K20me3  |        |       | acetylated   |
| 343                 | O 7              | G K G G A K R H R Kac V L Rme2a D N I Q G I T   | ▶        | H4 11-30                | R24me2a | K20ac   |        |       | acetylated   |
| 344                 | O 8              | G K G G A K R H R Kme1 V L Rme2s D N I Q G I T  | ▶        | H4 11-30                | R24me2s | K20me1  |        |       | acetylated   |
| 345                 | O 9              | G K G G A K R H R Kme2 V L Rme2s D N I Q G I T  | ▶        | H4 11-30                | R24me2s | K20me2  |        |       | acetylated   |
| 346                 | O10              | G K G G A K R H R Kme3 V L Rme2s D N I Q G I T  | ▶        | H4 11-30                | R24me2s | K20me3  |        |       | acetylated   |
| 347                 | O11              | G K G G A K R H R Kac V L Rme2s D N I Q G I T   | ▶        | H4 11-30                | R24me2s | K20ac   |        |       | acetylated   |
| 348                 | O12              | S G R G K Q G G K A R A K A K S R S S           | ▶        | H2a 1-19                | unmod   |         |        |       | free         |
| 349                 | O13              | pS G R G K Q G G K A R A K A K S R S S          | ▶        | H2a 1-19                | S1P     |         |        |       | free         |
| 350                 | O14              | S G R G Kac Q G G K A R A K A K S R S S         | ▶        | H2a 1-19                | K5ac    |         |        |       | free         |
| 351                 | O15              | S G R G K Q G G Kac A R A K A K S R S S         | ▶        | H2a 1-19                | K9ac    |         |        |       | free         |
| 352                 | O16              | S G R G K Q G G K A R A Kac A K S R S S         | ▶        | H2a 1-19                | K13ac   |         |        |       | free         |
| 353                 | O17              | pS G R G Kac Q G G K A R A K A K S R S S        | ▶        | H2a 1-19                | S1P     | K5ac    |        |       | free         |
| 354                 | O18              | pS G R G K Q G G Kac A R A K A K S R S S        | ▶        | H2a 1-19                | S1P     | K9ac    |        |       | free         |
| 355                 | O19              | pS G R G K Q G G K A R A Kac A K S R S S        | ▶        | H2a 1-19                | S1P     | K13ac   |        |       | free         |
| 356                 | O20              | S G R G Kac Q G G Kac A R A K A K S R S S       | ▶        | H2a 1-19                | K5ac    | K9ac    |        |       | free         |
| 357                 | O21              | S G R G Kac Q G G K A R A Kac A K S R S S       | ▶        | H2a 1-19                | K5ac    | K13ac   |        |       | free         |
| 358                 | O22              | S G R G K Q G G Kac A R A Kac A K S R S S       | ▶        | H2a 1-19                | K9ac    | K13ac   |        |       | free         |
| 359                 | O23              | pS G R G Kac Q G G Kac A R A K A K S R S S      | ▶        | H2a 1-19                | S1P     | K5ac    | K9ac   |       | free         |
| 360                 | O24              | pS G R G Kac Q G G K A R A Kac A K S R S S      | ▶        | H2a 1-19                | S1P     | K5ac    | K13ac  |       | free         |
| 361                 | P 1              | pS G R G K Q G G Kac A R A Kac A K S R S S      | ▶        | H2a 1-19                | S1P     | K9ac    | K13ac  |       | free         |
| 362                 | P 2              | S G R G Kac Q G G Kac A R A Kac A K S R S S     | ▶        | H2a 1-19                | K5ac    | K9ac    | K13ac  |       | free         |
| 363                 | P 3              | pS G R G Kac Q G G Kac A R A Kac A K S R S S    | ▶        | H2a 1-19                | S1P     | K5ac    | K9ac   | K13ac | free         |
| 364                 | P 4              | P D P A K S A P A P K K G S K K A V T           | ▶        | H2B 1-19                | unmod   |         |        |       | free         |
| 365                 | P 5              | P D P A Kac S A P A P K K G S K K A V T         | ▶        | H2B 1-19                | K5ac    |         |        |       | free         |
| 366                 | P 6              | P D P A K S A P A P K Kac G S K K A V T         | ▶        | H2B 1-19                | K12ac   |         |        |       | free         |
| 367                 | P 7              | P D P A K S A P A P K K G pS K K A V T          | ▶        | H2B 1-19                | S14P    |         |        |       | free         |
| 368                 | P 8              | P D P A K S A P A P K K G S Kac K A V T         | ▶        | H2B 1-19                | K15ac   |         |        |       | free         |
| 369                 | P 9              | P D P A Kac S A P A P K Kac G S K K A V T       | ▶        | H2B 1-19                | K5ac    | K12ac   |        |       | free         |
| 370                 | P10              | P D P A Kac S A P A P K K G pS K K A V T        | ▶        | H2B 1-19                | K5ac    | S14P    |        |       | free         |
| 371                 | P11              | P D P A Kac S A P A P K K G S Kac K A V T       | ▶        | H2B 1-19                | K5ac    | K15ac   |        |       | free         |
| 372                 | P12              | P D P A K S A P A P K Kac G pS K K A V T        | ▶        | H2B 1-19                | K12ac   | S14P    |        |       | free         |
| 373                 | P13              | P D P A K S A P A P K Kac G S Kac K A V T       | ▶        | H2B 1-19                | K12ac   | K15ac   |        |       | free         |
| 374                 | P14              | P D P A K S A P A P K K G pS Kac K A V T        | ▶        | H2B 1-19                | S14P    | K15ac   |        |       | free         |
| 375                 | P15              | P D P A Kac S A P A P K Kac G pS K K A V T      | ▶        | H2B 1-19                | K5ac    | K12ac   | S14P   |       | free         |
| 376                 | P16              | P D P A Kac S A P A P K Kac G S Kac K A V T     | ▶        | H2B 1-19                | K5ac    | K12ac   | K15ac  |       | free         |
| 377                 | P17              | P D P A Kac S A P A P K K G pS Kac K A V T      | ▶        | H2B 1-19                | K5ac    | S14P    | K15ac  |       | free         |
| 378                 | P18              | P D P A K S A P A P K Kac G pS Kac K A V T      | ▶        | H2B 1-19                | K12ac   | S14P    | K15ac  |       | free         |
| 379                 | P19              | P D P A Kac S A P A P K Kac G pS Kac K A V T    | ▶        | H2B 1-19                | K5ac    | K12ac   | S14P   | K15ac | free         |
| 380                 | P20              | Bio A A N W S H P Q F E K A A                   | ▶        | biotin, control peptide |         |         |        |       | biotinylated |

**Active Motif**  
**MODified™ Histone Peptide Array\***  
**Catalog Nos. 13001 & 13005**

| <b>Modification number</b> | <b>Peptide location</b> | <b>Peptide sequence</b>                                   | <b>to array</b> | <b>name</b>   | <b>Mod1</b> | <b>Mod2</b> | <b>Mod 3</b> | <b>Mod 4</b> | <b>N-terminus</b> |
|----------------------------|-------------------------|-----------------------------------------------------------|-----------------|---------------|-------------|-------------|--------------|--------------|-------------------|
| 381                        | P21                     | E Q K L I S E E D L A                                     | ▶               | c-myc tag     |             |             |              |              | free              |
| 382                        | P22                     | HAc                                                       | ▶               | neg. control  |             |             |              |              | acetylated        |
| 383                        | P23                     | K Kme1 Kme2 Kme3 Kac R Rme2s R Rme2a R Cit K Kme1 Kac Kme | ▶               | background 01 |             |             |              |              | acetylated        |
| 384                        | P24                     | R Rme2s K Kme1 Kac R Rme2a Kme2 K Kme3 R Kme1 Rme2s K Kac | ▶               | background 02 |             |             |              |              | acetylated        |

\*CelluSpots™ arrays are manufactured under license by INTAVIS Bioanalytical Instruments AG
